# Supplementary material for: Das Big Five Inventar 2
Source: Atypon-hosted journal article supplement (doi:10.1026/0012-1924/a000218), 2019-02-01
Supplement: 0012-1924_a000218_esm1.pdf [file 0012-1924_a000218_esm1.pdf]

*Elektronisches Supplement 1. Das Big Five Inventar 2*

*Tabelle E1. Reliabilitätsschätzer der NEO-PI-R, NEO-FFI, BFI-1, BFI-S und BFI-10 Domänenwerte*

|                        | NEO-PI-R | NEO-<br>FFI | BFI-1 | BFI-S | BFI-10 |
|------------------------|----------|-------------|-------|-------|--------|
| Extraversion           | .90      | .82         | .88   | .75   | .64    |
| Verträglichkeit        | .88      | .76         | .75   | .58   | .37    |
| Gewissenhaftigkeit     | .93      | .85         | .85   | .61   | .51    |
| Negative Emotionalität | .95      | .90         | .74   | .71   | .59    |
| Offenheit              | .86      | .71         | .83   | .71   | .44    |

Tabelle E2. *Reliabilitätsschätzer der NEO-PI-R Facettenwerte*

|                    |               |               |                        |                      |                 |                 |
|--------------------|---------------|---------------|------------------------|----------------------|-----------------|-----------------|
| Extraversion       | Herzlichkeit  | Geselligkeit  | Durchsetzungsfähigkeit | Aktivität            | Erlebnishunger  | Frohsinn        |
|                    | .78           | .78           | .82                    | .63                  | .65             | .84             |
| Verträglichkeit    | Vertrauen     | Freimütigkeit | Altruismus             | Entgegenkommen       | Bescheidenheit  | Gutherzigkeit   |
|                    | .80           | .63           | .74                    | .66                  | .74             | .60             |
| Gewissenhaftigkeit | Kompetenz     | Ordnungsliebe | Pflichtbewusstsein     | Leistungsstreben     | Selbstdisziplin | Besonnenheit    |
|                    | .74           | .68           | .72                    | .72                  | .82             | .75             |
| Neurotizismus      | Ängstlichkeit | Reizbarkeit   | Depression             | Soziale Befangenheit | Impulsivität    | Verletzlichkeit |
|                    | .84           | .78           | .89                    | .77                  | .60             | .83             |
| Offenheit          | Phantasie     | Ästhetik      | Gefühle                | Handlungen           | Ideen           | Werte           |
|                    | .69           | .79           | .71                    | .64                  | .79             | .26             |

Tabelle E3. *Lebenserfolgsindikatoren*

| Indikator           | Item                                                                                                                                                                                   | Antwortskala                                                                                                                                                                                                                                                                                                                                                                                                                                                                                                                                                                                                |
|---------------------|----------------------------------------------------------------------------------------------------------------------------------------------------------------------------------------|-------------------------------------------------------------------------------------------------------------------------------------------------------------------------------------------------------------------------------------------------------------------------------------------------------------------------------------------------------------------------------------------------------------------------------------------------------------------------------------------------------------------------------------------------------------------------------------------------------------|
| Bildungserfolg      | Welcher ist der höchste Bildungsabschluss, den Sie erreicht haben?                                                                                                                     | 1 = noch Schüler*, 2 = Schule beendet ohne Abschluss, 3 = Volks-/Hauptschulabschluss bzw. Polytechnische Oberschule mit Abschluss 8. oder 9. Klasse, 4 = Mittlere Reife, Realschulabschluss bzw. Polytechnische Oberschule mit Abschluss 10. Klasse, 5 = Fachhochschulreife (Abschluss einer Fachoberschule), 6 = Abitur bzw. erweiterte Oberschule mit Abschluss 12. Klasse (Hochschulreife), 7 = Hochschulabschluss, 8 = anderer Schulabschluss*                                                                                                                                                          |
| Einkommen           | Wie hoch ist Ihr eigenes durchschnittliches monatliches Nettoeinkommen, das heißt die Summe Ihrer Einkünfte, die nach Abzug der Steuern und Sozial-versicherungsbeiträge übrig bleibt? | 1 = unter 300 Euro, 2 = 300 bis unter 500 Euro, 3 = 500 bis unter 700 Euro, 4 = 700 bis unter 900 Euro, 5 = 900 bis unter 1.100 Euro, 6 = 1.100 bis unter 1.300 Euro, 7 = 1.300 bis unter 1.500 Euro, 8 = 1.500 bis unter 1.700 Euro, 9 = 1.700 bis unter 2.000 Euro, 10 = 2.000 bis unter 2.300 Euro, 11 = 2.300 bis unter 2.600 Euro, 12 = 2.600 bis unter 3.200 Euro, 13 = 3.200 bis unter 4.000 Euro, 14 = 4.000 bis unter 5.000 Euro, 15 = 5.000 bis unter 6.000 Euro, 16 = 6.000 bis unter 10.000 Euro, 17 = 10.000 und mehr Euro, 18 = kein eigenes Einkommen*, 19 = weiß nicht*, 20 = keine Angabe* |
| Gesundheit          | Wie würden Sie Ihren Gesundheitszustand (physisch und mental) im Allgemeinen beschreiben?                                                                                              | 1 = sehr gut, 2 = gut, 3 = zufriedenstellend, 4 = weniger gut, 5 = schlecht, 6 = keine Angabe*                                                                                                                                                                                                                                                                                                                                                                                                                                                                                                              |
| Lebenszufriedenheit | Wie zufrieden sind Sie gegenwärtig, alles in allem, mit Ihrem Leben?                                                                                                                   | 0 = ganz und gar unzufrieden, 1. 2. 3. 4. 5. 6. 7. 8. 9. 10 = ganz und gar zufrieden                                                                                                                                                                                                                                                                                                                                                                                                                                                                                                                        |

*Anmerkungen.* \* rekodiert als fehlender Wert, der Indikator Gesundheit wird rekodiert (6 - Rohwert).

Tabelle E4.

*Ladungsmuster der BFI-2 Items (orthogonale Rotation)*

| Domäne          | Item-<br>Nr.                                                 | Item                                                           | PCA         |             |      |      |            | ESEM        |             |      |      |      |     |
|-----------------|--------------------------------------------------------------|----------------------------------------------------------------|-------------|-------------|------|------|------------|-------------|-------------|------|------|------|-----|
|                 |                                                              |                                                                | I           | II          | III  | IV   | V          | I           | II          | III  | IV   | V    | A   |
| Extraversion    | 1                                                            | Ich gehe aus mir heraus, bin gesellig.                         | <b>.70</b>  | .30         | -.09 | -.12 | .01        | <b>.67</b>  | .27         | -.07 | -.13 | .05  | .17 |
|                 | 6                                                            | Ich bin durchsetzungsfähig, energisch.                         | <b>.61</b>  | -.10        | -.21 | -.21 | .13        | <b>.55</b>  | -.08        | -.16 | -.23 | .16  | .18 |
|                 | 11                                                           | Ich schäume selten vor Begeisterung über.                      | <b>-.42</b> | -.23        | -.05 | -.12 | -.12       | <b>-.37</b> | -.16        | -.02 | -.06 | -.12 | .16 |
|                 | 16                                                           | Ich bin eher ruhig.                                            | <b>-.63</b> | .07         | -.07 | -.30 | .01        | <b>-.59</b> | .11         | -.06 | -.22 | .01  | .16 |
|                 | 21                                                           | Ich neige dazu, die Führung zu übernehmen.                     | <b>.60</b>  | -.21        | -.06 | -.07 | .23        | <b>.53</b>  | -.21        | -.04 | -.11 | .24  | .15 |
|                 | 26                                                           | Ich bin weniger aktiv und unternehmungslustig als andere.      | <b>-.48</b> | -.22        | .12  | .13  | -.13       | <b>-.43</b> | -.18        | .13  | .16  | -.13 | .16 |
|                 | 31                                                           | Ich bin eher schüchtern.                                       | <b>-.68</b> | -.01        | .11  | .15  | -.09       | <b>-.63</b> | .00         | .13  | .19  | -.10 | .14 |
|                 | 36                                                           | Mir fällt es schwer, andere zu beeinflussen.                   | <b>-.50</b> | .08         | -.01 | .15  | -.21       | <b>-.44</b> | .07         | .01  | .19  | -.18 | .18 |
|                 | 41                                                           | Ich bin voller Energie und Tatendrang                          | <b>.52</b>  | .13         | -.28 | -.33 | .17        | <b>.48</b>  | .12         | -.24 | -.33 | .21  | .19 |
|                 | 46                                                           | Ich bin gesprächig.                                            | <b>.67</b>  | .28         | -.03 | -.03 | .02        | <b>.64</b>  | .24         | -.01 | -.05 | .07  | .17 |
|                 | 51                                                           | In einer Gruppe überlasse ich lieber anderen die Entscheidung. | <b>-.57</b> | .11         | .05  | .12  | -.29       | <b>-.51</b> | .11         | .07  | .16  | -.27 | .17 |
| 56              | Ich bin begeisterungsfähig und kann andere leicht mitreißen. | <b>.64</b>                                                     | .16         | -.10        | -.16 | .24  | <b>.59</b> | .14         | -.07        | -.17 | .27  | .15  |     |
| Verträglichkeit | 2                                                            | Ich bin einfühlsam, warmherzig.                                | .13         | <b>.64</b>  | -.17 | -.01 | .11        | .15         | <b>.58</b>  | -.14 | .03  | .13  | .20 |
|                 | 7                                                            | Ich begegne anderen mit Respekt.                               | .05         | <b>.50</b>  | -.20 | -.15 | .13        | .07         | <b>.46</b>  | -.16 | -.11 | .15  | .22 |
|                 | 12                                                           | Ich neige dazu, andere zu kritisieren.                         | .24         | <b>-.38</b> | .08  | .35  | .03        | .20         | <b>-.36</b> | .11  | .29  | .05  | .18 |
|                 | 17                                                           | Ich habe mit anderen wenig Mitgefühl.                          | -.09        | <b>-.64</b> | .03  | -.04 | -.14       | -.11        | <b>-.58</b> | .05  | -.05 | -.13 | .17 |
|                 | 22                                                           | Ich habe oft Streit mit anderen.                               | .15         | <b>-.38</b> | .22  | .36  | -.03       | .12         | <b>-.37</b> | .23  | .31  | -.02 | .20 |

|                    |    |                                                                       |      |             |             |      |      |      |             |             |            |      |     |
|--------------------|----|-----------------------------------------------------------------------|------|-------------|-------------|------|------|------|-------------|-------------|------------|------|-----|
|                    | 27 | Ich bin nachsichtig, vergebe anderen leicht.                          | -.08 | <b>.53</b>  | .01         | -.15 | .03  | -.06 | <b>.45</b>  | -.02        | -.09       | .06  | .17 |
|                    | 32 | Ich bin hilfsbereit und selbstlos.                                    | .05  | <b>.60</b>  | -.19        | -.01 | .05  | .06  | <b>.53</b>  | -.15        | .02        | .08  | .21 |
|                    | 37 | Ich bin manchmal unhöflich und schroff.                               | .08  | <b>-.54</b> | .24         | .32  | -.02 | .06  | <b>-.52</b> | .25         | .27        | -.01 | .16 |
|                    | 42 | Ich bin anderen gegenüber misstrauisch.                               | -.30 | <b>-.32</b> | -.18        | .32  | -.03 | -.25 | -.26        | -.08        | <b>.29</b> | -.04 | .18 |
|                    | 47 | Andere sind mir eher gleichgültig, egal.                              | -.20 | <b>-.66</b> | .04         | .00  | -.16 | -.21 | <b>-.60</b> | .07         | .00        | -.14 | .17 |
|                    | 52 | Ich bin höflich und zuvorkommend.                                     | -.01 | <b>.58</b>  | -.28        | -.11 | .02  | .01  | <b>.54</b>  | -.24        | -.07       | .06  | .23 |
|                    | 57 | Ich schenke anderen leicht Vertrauen, glaube an das Gute im Menschen. | .13  | <b>.54</b>  | .18         | -.10 | -.04 | .11  | <b>.44</b>  | .12         | -.06       | .01  | .12 |
| Gewissenhaftigkeit | 3  | Ich bin eher unordentlich.                                            | .05  | -.05        | <b>.76</b>  | -.02 | .04  | .04  | -.03        | <b>.77</b>  | -.02       | .04  | .15 |
|                    | 8  | Ich bin bequem, neige zur Faulheit.                                   | -.14 | -.09        | <b>.62</b>  | .10  | -.10 | -.14 | -.09        | <b>.56</b>  | .12        | -.09 | .15 |
|                    | 13 | Ich bin stetig, beständig.                                            | -.02 | .04         | <b>-.42</b> | -.35 | .02  | -.01 | .08         | <b>-.35</b> | -.30       | .05  | .21 |
|                    | 18 | Ich bin systematisch, halte meine Sachen in Ordnung.                  | -.03 | .01         | <b>-.78</b> | -.07 | .01  | -.03 | .01         | <b>-.77</b> | -.05       | .03  | .16 |
|                    | 23 | Ich neige dazu, Aufgaben vor mir herzuschieben.                       | -.11 | -.01        | <b>.64</b>  | .21  | .02  | -.10 | -.03        | <b>.57</b>  | .22        | .02  | .16 |
|                    | 28 | Ich bin manchmal ziemlich nachlässig.                                 | -.14 | -.08        | <b>.63</b>  | .16  | -.06 | -.14 | -.09        | <b>.56</b>  | .17        | -.05 | .17 |
|                    | 33 | Ich mag es sauber und aufgeräumt.                                     | .04  | .16         | <b>-.69</b> | .10  | .01  | .06  | .14         | <b>-.65</b> | .11        | .04  | .19 |
|                    | 38 | Ich bin effizient, erledige Dinge schnell.                            | .22  | -.03        | <b>-.60</b> | -.19 | .12  | .21  | -.02        | <b>-.52</b> | -.18       | .15  | .19 |
|                    | 43 | Ich bin verlässlich, auf mich kann man zählen.                        | .09  | .33         | <b>-.44</b> | -.13 | .08  | .10  | .31         | <b>-.35</b> | -.11       | .11  | .23 |
|                    | 48 | Ich bin eher der chaotische Typ, mache selten sauber.                 | -.03 | -.13        | <b>.77</b>  | .00  | .01  | -.04 | -.12        | <b>.77</b>  | .01        | .01  | .15 |
|                    | 53 | Ich bleibe an einer Aufgabe dran, bis sie erledigt ist.               | .14  | .09         | <b>-.58</b> | -.23 | .13  | .14  | .11         | <b>-.48</b> | -.21       | .15  | .21 |
|                    | 58 | Manchmal verhalte ich mich verantwortungslos, leichtsinnig.           | .03  | -.22        | <b>.41</b>  | .26  | -.04 | .01  | -.23        | <b>.37</b>  | .24        | -.03 | .21 |

|                           |    |                                                              |      |      |      |             |             |      |      |      |             |             |     |
|---------------------------|----|--------------------------------------------------------------|------|------|------|-------------|-------------|------|------|------|-------------|-------------|-----|
| Negative<br>Emotionalität | 4  | Ich bleibe auch in stressigen Situationen gelassen.          | .08  | .02  | -.07 | <b>-.67</b> | .08         | .04  | .08  | -.06 | <b>-.61</b> | .11         | .18 |
|                           | 9  | Ich bleibe auch bei Rückschlägen zuversichtlich.             | .26  | .14  | -.13 | <b>-.61</b> | .14         | .23  | .16  | -.13 | <b>-.56</b> | .17         | .19 |
|                           | 14 | Ich kann launisch sein, habe schwankende Stimmungen.         | .00  | -.17 | .15  | <b>.63</b>  | -.09        | .01  | -.20 | .17  | <b>.57</b>  | -.07        | .15 |
|                           | 19 | Ich reagiere leicht angespannt.                              | -.10 | -.22 | .06  | <b>.68</b>  | .00         | -.07 | -.25 | .08  | <b>.63</b>  | .01         | .18 |
|                           | 24 | Ich bin selbstsicher, mit mir zufrieden.                     | .42  | -.02 | -.20 | <b>-.55</b> | .08         | .38  | .01  | -.19 | <b>-.54</b> | .11         | .17 |
|                           | 29 | Ich bin ausgeglichen, nicht leicht aus der Ruhe zu bringen.  | -.06 | .12  | -.08 | <b>-.78</b> | .08         | -.09 | .18  | -.09 | <b>-.71</b> | .11         | .16 |
|                           | 34 | Ich mache mir oft Sorgen.                                    | -.23 | .18  | -.05 | <b>.62</b>  | .04         | -.17 | .14  | .00  | <b>.59</b>  | .04         | .16 |
|                           | 39 | Ich fühle mich oft bedrückt, freudlos.                       | -.42 | -.04 | .12  | <b>.60</b>  | .02         | -.36 | -.05 | .15  | <b>.60</b>  | .01         | .15 |
|                           | 44 | Ich habe meine Gefühle unter Kontrolle, werde selten wütend. | -.14 | .17  | -.16 | <b>-.65</b> | .08         | -.15 | .22  | -.16 | <b>-.58</b> | .10         | .17 |
|                           | 49 | Ich werde selten nervös und unsicher.                        | .22  | -.04 | -.07 | <b>-.61</b> | -.02        | .17  | .01  | -.07 | <b>-.56</b> | .01         | .16 |
|                           | 54 | Ich bin oft deprimiert, niedergeschlagen.                    | -.37 | -.02 | .17  | <b>.65</b>  | .00         | -.33 | -.04 | .19  | <b>.65</b>  | -.01        | .14 |
|                           | 59 | Ich reagiere schnell gereizt oder genervt.                   | .04  | -.31 | .17  | <b>.71</b>  | -.11        | .06  | -.35 | .20  | <b>.66</b>  | -.10        | .16 |
| Offenheit                 | 5  | Ich bin nicht sonderlich kunstinteressiert.                  | .04  | -.09 | -.03 | -.03        | <b>-.67</b> | .02  | -.08 | .01  | -.03        | <b>-.60</b> | .13 |
|                           | 10 | Ich bin vielseitig interessiert.                             | .24  | .20  | -.14 | -.16        | <b>.52</b>  | .23  | .19  | -.10 | -.14        | <b>.50</b>  | .20 |
|                           | 15 | Ich bin erfinderisch, mir fallen raffinierte Lösungen ein.   | .28  | -.11 | -.09 | -.06        | <b>.59</b>  | .26  | -.09 | -.05 | -.06        | <b>.55</b>  | .17 |
|                           | 20 | Ich kann mich für Kunst, Musik und Literatur begeistern.     | -.01 | .16  | .04  | .02         | <b>.69</b>  | .00  | .14  | .03  | .05         | <b>.66</b>  | .13 |
|                           | 25 | Ich meide philosophische Diskussionen.                       | -.16 | -.03 | -.07 | .02         | <b>-.54</b> | -.15 | -.03 | -.04 | .03         | <b>-.46</b> | .14 |
|                           | 30 | Ich bin nicht besonders einfallsreich.                       | -.27 | -.02 | .16  | .08         | <b>-.53</b> | -.26 | -.03 | .15  | .11         | <b>-.47</b> | .17 |
|                           | 35 | Ich weiß Kunst und Schönheit zu schätzen.                    | -.02 | .22  | -.09 | .02         | <b>.71</b>  | .00  | .20  | -.08 | .05         | <b>.69</b>  | .15 |

|    |                                                                                     |      |      |      |      |             |      |      |      |      |             |     |
|----|-------------------------------------------------------------------------------------|------|------|------|------|-------------|------|------|------|------|-------------|-----|
| 40 | Es macht mir Spaß, gründlich über komplexe Dinge nachzudenken und sie zu verstehen. | .08  | -.06 | -.17 | -.23 | <b>.60</b>  | .07  | -.03 | -.13 | -.20 | <b>.55</b>  | .17 |
| 45 | Ich bin nicht sonderlich fantasievoll.                                              | -.22 | -.09 | .10  | .03  | <b>-.58</b> | -.22 | -.08 | .10  | .05  | <b>-.51</b> | .16 |
| 50 | Ich finde Gedichte und Theaterstücke langweilig.                                    | .01  | -.19 | -.01 | -.04 | <b>-.59</b> | -.01 | -.16 | .02  | -.04 | <b>-.52</b> | .13 |
| 55 | Mich interessieren abstrakte Überlegungen wenig.                                    | -.10 | .03  | -.05 | .04  | <b>-.59</b> | -.11 | .02  | -.04 | .06  | <b>-.50</b> | .16 |
| 60 | Ich bin originell, entwickle neue Ideen.                                            | .37  | -.07 | -.07 | -.13 | <b>.59</b>  | .34  | -.06 | -.04 | -.13 | <b>.56</b>  | .17 |

*Anmerkungen.* PCA: Der Eigenwerteverlauf war 11.47, 5.22, 3.99, 3.57, 2.89, 1.66, 1.32, 1.29, 1.18, 1.14, 1.00, 0.95, 0.91, 0.83, 0.83, 0.81, 0.80, 0.75, 0.73, 0.72, 0.71, 0.69, 0.67, 0.66, 0.64, 0.63, 0.62, 0.60, 0.58, 0.57, 0.56, 0.55, 0.53, 0.52, 0.51, 0.50, 0.49, 0.47, 0.46, 0.45, 0.43, 0.42, 0.42, 0.41, 0.40, 0.39, 0.38, 0.37, 0.36, 0.36, 0.33, 0.33, 0.32, 0.30, 0.30, 0.29, 0.27, 0.26, 0.21, 0.00, das Modell erklärt 48 % Gesamtvarianz auf. ESEM: A = Akquieszenz, ESEM: RMSEA = .05, CFI = .84,  $N = 1\ 224$ . Die höchste Ladung ist fett hervorgehoben.





Tabelle E5. Korrelationen der BFI-2 Domänen mit anderen Big-Five Inventaren

|                        | NEO-PI-R        |                 | NEO-FFI         |                 | BFI-1           |                 |
|------------------------|-----------------|-----------------|-----------------|-----------------|-----------------|-----------------|
|                        | DE<br>(N = 192) | US<br>(N = 438) | DE<br>(N = 192) | US<br>(N = 192) | DE<br>(N = 185) | US<br>(N = 438) |
| Extraversion           | .81             | .68             | .77             | .71             | .86             | .93             |
| Verträglichkeit        | .78             | .71             | .72             | .74             | .78             | .93             |
| Gewissenhaftigkeit     | .81             | .74             | .82             | .80             | .85             | .91             |
| Negative Emotionalität | .87             | .73             | .84             | .76             | .88             | .94             |
| Offenheit              | .65             | .74             | .64             | .73             | .87             | .84             |
| Mittelwert             | .79             | .72             | .77             | .75             | .85             | .92             |

Anmerkung. Alle Korrelationen  $p < .001$ .



Tabelle E6. Korrelationen zwischen den Big Five Domänenwerten für verschiedene Inventare

|                     | N     | Korrelation |         |         |         |         |         |         |         |         | Mittelwert |         |
|---------------------|-------|-------------|---------|---------|---------|---------|---------|---------|---------|---------|------------|---------|
|                     |       | E mit V     | E mit G | E mit N | E mit O | V mit G | V mit N | V mit O | G mit N | G mit O |            | N mit O |
| BFI-2 (Deutschland) | 1 224 | .21         | .25     | -.38    | .41     | .33     | -.38    | .22     | -.37    | .17     | -.21       | .30     |
| BFI-2 (USA)*        | 1 000 | .14         | .22     | -.34    | .20     | .28     | -.29    | .15     | -.30    | -.02    | -.06       | .20     |
| NEO-PI-R            | 192   | .06         | .33     | -.41    | .48     | .22     | -.16    | .17     | -.51    | .35     | -.21       | .30     |
| NEO-FFI             | 192   | .38         | .31     | -.45    | .27     | .40     | -.26    | .24     | -.35    | .25     | -.20       | .31     |
| BFI-1               | 185   | .16         | .42     | -.46    | .33     | .20     | -.39    | .16     | -.37    | .21     | -.12       | .29     |
| BFI-S               | 353   | .06         | .31     | -.27    | .43     | .37     | -.28    | .13     | -.37    | .22     | -.11       | .26     |
| BFI-10              | 185   | .15         | .27     | -.35    | .15     | .01     | -.23    | .11     | -.29    | .15     | -.09       | .18     |

Anmerkungen. E = Extraversion, V = Verträglichkeit, G = Gewissenhaftigkeit, N = Negative Emotionalität, O = Offenheit, \*aus Soto & John (2017, Tabelle 2).

Tabelle E7. Korrelationen der BFI-2 Facetten mit den NEO-PI-R Facetten

|                        |               |               |                        |                      |                 |                 |
|------------------------|---------------|---------------|------------------------|----------------------|-----------------|-----------------|
| Extraversion           | Herzlichkeit  | Geselligkeit  | Durchsetzungsfähigkeit | Aktivität            | Erlebnishunger  | Frohsinn        |
| Geselligkeit           | .46           | .53           | .56                    | .53                  | .23             | .50             |
| Durchsetzungsfähigkeit | .19           | .37           | .77                    | .53                  | .33             | .30             |
| Energie                | .52           | .57           | .43                    | .62                  | .24             | .68             |
| Verträglichkeit        | Vertrauen     | Freimütigkeit | Altruismus             | Entgegenkommen       | Bescheidenheit  | Gutherzigkeit   |
| Mitgefühl              | .49           | .34           | .69                    | .28                  | .17             | .63             |
| Respekt                | .47           | .48           | .60                    | .50                  | .26             | .41             |
| Vertrauen              | .73           | .28           | .48                    | .46                  | .17             | .38             |
| Gewissenhaftigkeit     | Kompetenz     | Ordnungsliebe | Pflichtbewusstsein     | Leistungsstreben     | Selbstdisziplin | Besonnenheit    |
| Ordnungsliebe          | .41           | .70           | .52                    | .46                  | .60             | .45             |
| Fleiß                  | .52           | .55           | .57                    | .59                  | .81             | .47             |
| Verlässlichkeit        | .54           | .54           | .64                    | .49                  | .67             | .62             |
| Negative Emotionalität | Ängstlichkeit | Reizbarkeit   | Depression             | Soziale Befangenheit | Impulsivität    | Verletzlichkeit |
| Ängstlichkeit          | .73           | .71           | .70                    | .53                  | .48             | .69             |
| Niedergeschlagenheit   | .70           | .63           | .84                    | .57                  | .41             | .70             |
| Unbeständigkeit        | .57           | .81           | .61                    | .48                  | .53             | .66             |
| Offenheit              | Phantasie     | Ästhetik      | Handlungen             | Gefühle              | Ideen           | Werte           |
| Ästhetisches Empfinden | .23           | .23           | .04                    | .02                  | .07             | -.04            |
| Neugierde              | .24           | .44           | .23                    | .32                  | .82             | .12             |
| Einfallsreichtum       | .29           | .40           | .28                    | .34                  | .60             | .04             |

Anmerkung.  $N = 192$ .

Tabelle E8. *Messinvarianz der BFI-2 Facettenwerte über Geschlechter und Altersgruppen*

|                                                                                       | Invarianzlevel | Geschlecht |       |      | Alter |       |      |
|---------------------------------------------------------------------------------------|----------------|------------|-------|------|-------|-------|------|
|                                                                                       |                | CFI        | RMSEA | SRMR | CFI   | RMSEA | SRMR |
| Extraversion: Geselligkeit,<br>Durchsetzungsfähigkeit,<br>Energie                     | konfigural     | .931       | .071  | .042 | .918  | .079  | .051 |
|                                                                                       | metrisch       | .929       | .069  | .048 | .920  | .073  | .056 |
|                                                                                       | skalar         | .922       | .070  | .053 | .902  | .077  | .063 |
|                                                                                       | residual       | .920       | .068  | .062 | .899  | .073  | .070 |
| Verträglichkeit: Mitgefühl,<br>Respekt, Vertrauen                                     | konfigural     | .896       | .073  | .054 | .899  | .073  | .060 |
|                                                                                       | metrisch       | .897       | .070  | .054 | .893  | .070  | .069 |
|                                                                                       | skalar         | .891       | .069  | .058 | .884  | .069  | .071 |
|                                                                                       | residual       | .892       | .066  | .064 | .857  | .072  | .094 |
| Gewissenhaftigkeit:<br>Ordnungsliebe, Fleiß,<br>Verlässlichkeit                       | konfigural     | .957       | .059  | .038 | .960  | .056  | .045 |
|                                                                                       | metrisch       | .956       | .058  | .043 | .961  | .053  | .056 |
|                                                                                       | skalar         | .944       | .063  | .051 | .943  | .060  | .064 |
|                                                                                       | residual       | .941       | .061  | .078 | .929  | .063  | .109 |
| Negative Emotionalität:<br>Ängstlichkeit,<br>Niedergeschlagenheit,<br>Unbeständigkeit | konfigural     | .937       | .081  | .053 | .930  | .084  | .060 |
|                                                                                       | metrisch       | .935       | .079  | .058 | .924  | .083  | .074 |
|                                                                                       | skalar         | .930       | .079  | .062 | .915  | .083  | .079 |
|                                                                                       | residual       | .930       | .076  | .059 | .909  | .080  | .083 |
| Offenheit: Ästhetisches<br>Empfinden, Neugierde,<br>Einfallsreichtum                  | konfigural     | .959       | .060  | .036 | .959  | .061  | .042 |
|                                                                                       | metrisch       | .959       | .057  | .038 | .953  | .060  | .056 |
|                                                                                       | skalar         | .956       | .057  | .040 | .937  | .067  | .064 |
|                                                                                       | residual       | .956       | .054  | .042 | .913  | .073  | .084 |

*Anmerkungen.* Die Überprüfung der Messinvarianz für die Facetten erfolgte analog zu Soto & John (2017) getrennt für die fünf Domänen mit Strukturgleichungsmodellen mit Akquieszenzfaktor. Altersgruppen: bis 30 Jahre, 31–40 Jahre, 41–50 Jahre, über 50 Jahre.  $N = 1\,224$ .

Tabelle E9. Referenzstatistiken für die BFI-2 Domänen

|         | N     | E    |     | V    |     | G    |     | N    |     | O    |     |
|---------|-------|------|-----|------|-----|------|-----|------|-----|------|-----|
|         |       | M    | SD  |
| Frauen  | 611   | 3.27 | .63 | 3.80 | .49 | 3.72 | .62 | 2.82 | .71 | 3.39 | .69 |
| Männer  | 613   | 3.13 | .61 | 3.64 | .51 | 3.57 | .59 | 2.66 | .68 | 3.28 | .63 |
| bis 30  | 296   | 3.20 | .63 | 3.64 | .52 | 3.42 | .58 | 2.89 | .71 | 3.25 | .67 |
| 31–40   | 224   | 3.14 | .71 | 3.59 | .52 | 3.58 | .58 | 2.91 | .72 | 3.26 | .66 |
| 41–50   | 269   | 3.21 | .63 | 3.76 | .46 | 3.70 | .63 | 2.74 | .68 | 3.32 | .69 |
| über 50 | 435   | 3.22 | .57 | 3.82 | .49 | 3.80 | .59 | 2.54 | .63 | 3.45 | .63 |
| Gesamt  | 1 224 | 3.20 | .62 | 3.72 | .51 | 3.64 | .61 | 2.74 | .70 | 3.34 | .66 |

Anmerkungen. E = Extraversion, V = Verträglichkeit, G = Gewissenhaftigkeit, N = Negative Emotionalität, O = Offenheit.

Tabelle E10

## Referenzstatistiken für die BFI-2 Facetten

| Domäne Facette |                        | Geschlecht |        | Alter  |       |       |         | Gesamt |       |
|----------------|------------------------|------------|--------|--------|-------|-------|---------|--------|-------|
|                |                        | Frauen     | Männer | bis 30 | 31–40 | 41–50 | über 50 |        |       |
|                |                        | <i>N</i>   | 611    | 613    | 296   | 224   | 269     | 435    | 1 224 |
| E              | Geselligkeit           | <i>M</i>   | 3.32   | 3.05   | 3.13  | 3.11  | 3.21    | 3.26   | 3.18  |
|                |                        | <i>SD</i>  | .83    | .78    | .85   | .92   | .82     | .73    | .82   |
|                | Durchsetzungs-vermögen | <i>M</i>   | 3.17   | 3.21   | 3.24  | 3.14  | 3.16    | 3.20   | 3.19  |
|                |                        | <i>SD</i>  | .76    | .73    | .75   | .79   | .74     | .73    | .75   |
|                | Energie                | <i>M</i>   | 3.32   | 3.11   | 3.24  | 3.17  | 3.25    | 3.21   | 3.22  |
|                |                        | <i>SD</i>  | .69    | .68    | .68   | .76   | .70     | .65    | .69   |
| V              | Mitgefühl              | <i>M</i>   | 4.10   | 3.78   | 3.89  | 3.80  | 3.96    | 4.03   | 3.93  |
|                |                        | <i>SD</i>  | .62    | .66    | .71   | .70   | .63     | .61    | .66   |
|                | Respekt                | <i>M</i>   | 4.12   | 4.00   | 3.96  | 3.92  | 4.11    | 4.17   | 4.05  |
|                |                        | <i>SD</i>  | .58    | .60    | .60   | .61   | .54     | .58    | .59   |
|                | Vertrauen              | <i>M</i>   | 3.17   | 3.15   | 3.07  | 3.04  | 3.21    | 3.25   | 3.15  |
|                |                        | <i>SD</i>  | .63    | .64    | .64   | .67   | .61     | .61    | .63   |
| G              | Ordnungsliebe          | <i>M</i>   | 3.75   | 3.60   | 3.44  | 3.64  | 3.72    | 3.83   | 3.67  |
|                |                        | <i>SD</i>  | .87    | .85    | .90   | .84   | .87     | .80    | .86   |
|                | Fleiß                  | <i>M</i>   | 3.55   | 3.44   | 3.25  | 3.45  | 3.57    | 3.63   | 3.48  |
|                |                        | <i>SD</i>  | .74    | .70    | .67   | .70   | .73     | .72    | .71   |
|                | Verlässlichkeit        | <i>M</i>   | 3.87   | 3.66   | 3.56  | 3.66  | 3.81    | 3.93   | 3.75  |
|                |                        | <i>SD</i>  | .59    | .57    | .56   | .60   | .59     | .55    | .58   |
| N              | Ängstlichkeit          | <i>M</i>   | 3.07   | 2.84   | 3.06  | 3.11  | 2.98    | 2.80   | 2.98  |
|                |                        | <i>SD</i>  | .71    | .71    | .73   | .74   | .73     | .67    | .72   |
|                | Niedergeschlagenheit   | <i>M</i>   | 2.63   | 2.56   | 2.77  | 2.71  | 2.58    | 2.43   | 2.61  |
|                |                        | <i>SD</i>  | .90    | .83    | .89   | .93   | .86     | .79    | .89   |
|                | Unbeständigkeit        | <i>M</i>   | 2.74   | 2.56   | 2.84  | 2.89  | 2.66    | 2.39   | 2.68  |
|                |                        | <i>SD</i>  | .82    | .79    | .85   | .83   | .74     | .74    | .80   |
| O              | Neugierde              | <i>M</i>   | 3.48   | 3.46   | 3.40  | 3.42  | 3.49    | 3.53   | 3.47  |
|                |                        | <i>SD</i>  | .71    | .71    | .73   | .71   | .72     | .69    | .71   |
|                | Ästhetisches Empfinden | <i>M</i>   | 3.18   | 2.89   | 2.90  | 2.95  | 2.97    | 3.22   | 3.02  |
|                |                        | <i>SD</i>  | .98    | .96    | .98   | .99   | 1.03    | .92    | .98   |
|                | Einfallsreichtum       | <i>M</i>   | 3.51   | 3.50   | 3.44  | 3.42  | 3.51    | 3.60   | 3.50  |
|                |                        | <i>SD</i>  | .80    | .76    | .80   | .81   | .77     | .75    | .78   |

Anmerkungen. E = Extraversion, V = Verträglichkeit, G = Gewissenhaftigkeit, N = Negative Emotionalität, O = Offenheit.
