# Supplementary material for: Das Big Five Inventar 2
Source: Atypon-hosted journal article supplement (doi:10.1026/0012-1924/a000218), 2019-02-01
Supplement: 0012-1924_a000218_esm2.pdf [file 0012-1924_a000218_esm2.pdf]

## Elektronisches Supplement 2. Das Big Five Inventar 2

Tabelle E11. Normwerte für Extraversion

| Rohwert | Allgemeinbevölkerung<br>(N = 1 224) |     | Frauen<br>(N = 611) |     | Männer<br>(N = 613) |     | bis 30 J<br>(N = 296) |     | 31–40 J<br>(N = 224) |     | 41–50 J<br>(N = 269) |     | über 50 J<br>(N = 435) |     |
|---------|-------------------------------------|-----|---------------------|-----|---------------------|-----|-----------------------|-----|----------------------|-----|----------------------|-----|------------------------|-----|
|         | T                                   | PR  | T                   | PR  | T                   | PR  | T                     | PR  | T                    | PR  | T                    | PR  | T                      | PR  |
| 1.00    | 15                                  | 0   | 14                  | 0   | 15                  | 0   | 15                    | 0   | 20                   | 0   | 15                   | 0   | 11                     | 0   |
| 1.08    | 16                                  | 0   | 15                  | 0   | 16                  | 0   | 16                    | 0   | 21                   | 0   | 16                   | 0   | 12                     | 0   |
| 1.17    | 17                                  | 0   | 17                  | 0   | 18                  | 0   | 18                    | 0   | 22                   | 0   | 18                   | 0   | 14                     | 0   |
| 1.25    | 19                                  | 0   | 18                  | 0   | 19                  | 0   | 19                    | 0   | 23                   | 0   | 19                   | 0   | 15                     | 0   |
| 1.33    | 20                                  | 0   | 19                  | 0   | 20                  | 0   | 20                    | 0   | 25                   | 1   | 20                   | 0   | 17                     | 0   |
| 1.42    | 21                                  | 0   | 21                  | 0   | 22                  | 0   | 22                    | 0   | 26                   | 1   | 22                   | 0   | 18                     | 0   |
| 1.50    | 23                                  | 0   | 22                  | 0   | 23                  | 0   | 23                    | 0   | 27                   | 1   | 23                   | 0   | 20                     | 0   |
| 1.58    | 24                                  | 0   | 23                  | 0   | 25                  | 1   | 24                    | 1   | 28                   | 1   | 24                   | 0   | 21                     | 0   |
| 1.67    | 25                                  | 1   | 25                  | 1   | 26                  | 1   | 26                    | 1   | 29                   | 2   | 26                   | 1   | 23                     | 0   |
| 1.75    | 27                                  | 1   | 26                  | 1   | 27                  | 1   | 27                    | 1   | 30                   | 3   | 27                   | 1   | 24                     | 0   |
| 1.83    | 28                                  | 1   | 27                  | 1   | 29                  | 2   | 28                    | 1   | 32                   | 3   | 28                   | 1   | 26                     | 1   |
| 1.92    | 29                                  | 2   | 29                  | 2   | 30                  | 2   | 30                    | 2   | 33                   | 4   | 30                   | 2   | 27                     | 1   |
| 2.00    | 31                                  | 3   | 30                  | 2   | 31                  | 3   | 31                    | 3   | 34                   | 5   | 31                   | 3   | 29                     | 2   |
| 2.08    | 32                                  | 4   | 31                  | 3   | 33                  | 4   | 32                    | 4   | 35                   | 7   | 32                   | 4   | 30                     | 2   |
| 2.17    | 33                                  | 5   | 33                  | 4   | 34                  | 6   | 34                    | 5   | 36                   | 9   | 33                   | 5   | 32                     | 3   |
| 2.25    | 35                                  | 6   | 34                  | 5   | 36                  | 7   | 35                    | 7   | 37                   | 11  | 35                   | 6   | 33                     | 4   |
| 2.33    | 36                                  | 8   | 35                  | 7   | 37                  | 9   | 36                    | 8   | 39                   | 13  | 36                   | 8   | 34                     | 6   |
| 2.42    | 37                                  | 10  | 37                  | 9   | 38                  | 12  | 38                    | 11  | 40                   | 16  | 37                   | 10  | 36                     | 8   |
| 2.50    | 39                                  | 13  | 38                  | 11  | 40                  | 15  | 39                    | 13  | 41                   | 18  | 39                   | 13  | 37                     | 10  |
| 2.58    | 40                                  | 16  | 39                  | 14  | 41                  | 18  | 40                    | 16  | 42                   | 22  | 40                   | 16  | 39                     | 13  |
| 2.67    | 41                                  | 20  | 40                  | 17  | 42                  | 23  | 42                    | 20  | 43                   | 25  | 41                   | 20  | 40                     | 17  |
| 2.75    | 43                                  | 23  | 42                  | 20  | 44                  | 27  | 43                    | 24  | 45                   | 29  | 43                   | 23  | 42                     | 20  |
| 2.83    | 44                                  | 28  | 43                  | 24  | 45                  | 31  | 44                    | 28  | 46                   | 33  | 44                   | 27  | 43                     | 25  |
| 2.92    | 45                                  | 33  | 44                  | 29  | 47                  | 37  | 46                    | 33  | 47                   | 38  | 45                   | 32  | 45                     | 30  |
| 3.00    | 47                                  | 37  | 46                  | 33  | 48                  | 42  | 47                    | 38  | 48                   | 42  | 47                   | 37  | 46                     | 35  |
| 3.08    | 48                                  | 42  | 47                  | 38  | 49                  | 47  | 48                    | 42  | 49                   | 47  | 48                   | 42  | 48                     | 40  |
| 3.17    | 50                                  | 48  | 48                  | 44  | 51                  | 53  | 50                    | 48  | 50                   | 52  | 49                   | 47  | 49                     | 47  |
| 3.25    | 51                                  | 53  | 50                  | 49  | 52                  | 58  | 51                    | 53  | 52                   | 56  | 51                   | 53  | 51                     | 52  |
| 3.33    | 52                                  | 58  | 51                  | 54  | 53                  | 63  | 52                    | 58  | 53                   | 61  | 52                   | 58  | 52                     | 58  |
| 3.42    | 54                                  | 64  | 52                  | 59  | 55                  | 68  | 53                    | 64  | 54                   | 65  | 53                   | 63  | 54                     | 64  |
| 3.50    | 55                                  | 69  | 54                  | 64  | 56                  | 73  | 55                    | 68  | 55                   | 69  | 55                   | 68  | 55                     | 69  |
| 3.58    | 56                                  | 73  | 55                  | 69  | 57                  | 77  | 56                    | 73  | 56                   | 73  | 56                   | 72  | 56                     | 74  |
| 3.67    | 58                                  | 78  | 56                  | 74  | 59                  | 81  | 57                    | 77  | 57                   | 77  | 57                   | 77  | 58                     | 79  |
| 3.75    | 59                                  | 81  | 58                  | 78  | 60                  | 85  | 59                    | 81  | 59                   | 80  | 59                   | 80  | 59                     | 82  |
| 3.83    | 60                                  | 85  | 59                  | 81  | 61                  | 87  | 60                    | 84  | 60                   | 83  | 60                   | 84  | 61                     | 86  |
| 3.92    | 62                                  | 88  | 60                  | 85  | 63                  | 90  | 61                    | 87  | 61                   | 86  | 61                   | 87  | 62                     | 89  |
| 4.00    | 63                                  | 90  | 62                  | 88  | 64                  | 92  | 63                    | 90  | 62                   | 89  | 63                   | 90  | 64                     | 91  |
| 4.08    | 64                                  | 92  | 63                  | 90  | 66                  | 94  | 64                    | 92  | 63                   | 91  | 64                   | 92  | 65                     | 93  |
| 4.17    | 66                                  | 94  | 64                  | 92  | 67                  | 96  | 65                    | 94  | 65                   | 93  | 65                   | 94  | 67                     | 95  |
| 4.25    | 67                                  | 95  | 66                  | 94  | 68                  | 97  | 67                    | 95  | 66                   | 94  | 67                   | 95  | 68                     | 96  |
| 4.33    | 68                                  | 97  | 67                  | 95  | 70                  | 98  | 68                    | 96  | 67                   | 95  | 68                   | 96  | 69                     | 97  |
| 4.42    | 70                                  | 98  | 68                  | 97  | 71                  | 98  | 69                    | 97  | 68                   | 96  | 69                   | 97  | 71                     | 98  |
| 4.50    | 71                                  | 98  | 70                  | 97  | 72                  | 99  | 71                    | 98  | 69                   | 97  | 70                   | 98  | 72                     | 99  |
| 4.58    | 72                                  | 99  | 71                  | 98  | 74                  | 99  | 72                    | 99  | 70                   | 98  | 72                   | 99  | 74                     | 99  |
| 4.67    | 74                                  | 99  | 72                  | 99  | 75                  | 99  | 73                    | 99  | 72                   | 98  | 73                   | 99  | 75                     | 99  |
| 4.75    | 75                                  | 99  | 73                  | 99  | 77                  | 100 | 75                    | 99  | 73                   | 99  | 74                   | 99  | 77                     | 100 |
| 4.83    | 76                                  | 100 | 75                  | 99  | 78                  | 100 | 76                    | 100 | 74                   | 99  | 76                   | 99  | 78                     | 100 |
| 4.92    | 78                                  | 100 | 76                  | 100 | 79                  | 100 | 77                    | 100 | 75                   | 99  | 77                   | 100 | 80                     | 100 |
| 5.00    | 79                                  | 100 | 77                  | 100 | 81                  | 100 | 79                    | 100 | 76                   | 100 | 78                   | 100 | 81                     | 100 |

Tabelle E12. Normwerte für Verträglichkeit

| Rohwert | Allgemeinbevölkerung<br>(N = 1 224) |    | Frauen<br>(N = 611) |    | Männer<br>(N = 613) |     | bis 30 J<br>(N = 296) |     | 31-40 J<br>(N = 224) |     | 41-50 J<br>(N = 269) |     | über 50 J<br>(N = 435) |    |
|---------|-------------------------------------|----|---------------------|----|---------------------|-----|-----------------------|-----|----------------------|-----|----------------------|-----|------------------------|----|
|         | T                                   | PR | T                   | PR | T                   | PR  | T                     | PR  | T                    | PR  | T                    | PR  | T                      | PR |
| 1.00    | 0                                   | 0  | 0                   | 0  | 0                   | 0   | 0                     | 0   | 0                    | 0   | 0                    | 0   | 0                      | 0  |
| 1.08    | 0                                   | 0  | 0                   | 0  | 0                   | 0   | 1                     | 0   | 2                    | 0   | 0                    | 0   | 0                      | 0  |
| 1.17    | 0                                   | 0  | 0                   | 0  | 2                   | 0   | 3                     | 0   | 3                    | 0   | 0                    | 0   | 0                      | 0  |
| 1.25    | 2                                   | 0  | 0                   | 0  | 3                   | 0   | 4                     | 0   | 5                    | 0   | 0                    | 0   | 0                      | 0  |
| 1.33    | 3                                   | 0  | 0                   | 0  | 5                   | 0   | 6                     | 0   | 7                    | 0   | 0                    | 0   | 0                      | 0  |
| 1.42    | 5                                   | 0  | 1                   | 0  | 6                   | 0   | 7                     | 0   | 8                    | 0   | 0                    | 0   | 1                      | 0  |
| 1.50    | 6                                   | 0  | 3                   | 0  | 8                   | 0   | 9                     | 0   | 10                   | 0   | 1                    | 0   | 3                      | 0  |
| 1.58    | 8                                   | 0  | 5                   | 0  | 10                  | 0   | 10                    | 0   | 11                   | 0   | 3                    | 0   | 4                      | 0  |
| 1.67    | 10                                  | 0  | 7                   | 0  | 11                  | 0   | 12                    | 0   | 13                   | 0   | 5                    | 0   | 6                      | 0  |
| 1.75    | 11                                  | 0  | 8                   | 0  | 13                  | 0   | 14                    | 0   | 15                   | 0   | 6                    | 0   | 8                      | 0  |
| 1.83    | 13                                  | 0  | 10                  | 0  | 15                  | 0   | 15                    | 0   | 16                   | 0   | 8                    | 0   | 9                      | 0  |
| 1.92    | 15                                  | 0  | 12                  | 0  | 16                  | 0   | 17                    | 0   | 18                   | 0   | 10                   | 0   | 11                     | 0  |
| 2.00    | 16                                  | 0  | 13                  | 0  | 18                  | 0   | 18                    | 0   | 19                   | 0   | 12                   | 0   | 13                     | 0  |
| 2.08    | 18                                  | 0  | 15                  | 0  | 19                  | 0   | 20                    | 0   | 21                   | 0   | 13                   | 0   | 14                     | 0  |
| 2.17    | 20                                  | 0  | 17                  | 0  | 21                  | 0   | 22                    | 0   | 23                   | 0   | 15                   | 0   | 16                     | 0  |
| 2.25    | 21                                  | 0  | 18                  | 0  | 23                  | 0   | 23                    | 0   | 24                   | 0   | 17                   | 0   | 18                     | 0  |
| 2.33    | 23                                  | 0  | 20                  | 0  | 24                  | 1   | 25                    | 1   | 26                   | 1   | 19                   | 0   | 20                     | 0  |
| 2.42    | 25                                  | 1  | 22                  | 0  | 26                  | 1   | 27                    | 1   | 28                   | 1   | 21                   | 0   | 21                     | 0  |
| 2.50    | 26                                  | 1  | 23                  | 0  | 28                  | 1   | 28                    | 1   | 29                   | 2   | 23                   | 0   | 23                     | 0  |
| 2.58    | 28                                  | 1  | 25                  | 1  | 29                  | 2   | 30                    | 2   | 31                   | 3   | 24                   | 1   | 25                     | 1  |
| 2.67    | 29                                  | 2  | 27                  | 1  | 31                  | 3   | 31                    | 3   | 32                   | 4   | 26                   | 1   | 27                     | 1  |
| 2.75    | 31                                  | 3  | 29                  | 2  | 33                  | 4   | 33                    | 4   | 34                   | 5   | 28                   | 1   | 28                     | 1  |
| 2.83    | 33                                  | 4  | 30                  | 2  | 34                  | 6   | 34                    | 6   | 35                   | 7   | 30                   | 2   | 30                     | 2  |
| 2.92    | 34                                  | 6  | 32                  | 4  | 36                  | 8   | 36                    | 8   | 37                   | 10  | 32                   | 3   | 32                     | 3  |
| 3.00    | 36                                  | 8  | 34                  | 5  | 37                  | 10  | 38                    | 11  | 39                   | 13  | 33                   | 5   | 33                     | 5  |
| 3.08    | 37                                  | 10 | 35                  | 7  | 39                  | 14  | 39                    | 14  | 40                   | 16  | 35                   | 7   | 35                     | 7  |
| 3.17    | 39                                  | 14 | 37                  | 10 | 41                  | 18  | 41                    | 18  | 42                   | 21  | 37                   | 10  | 37                     | 9  |
| 3.25    | 41                                  | 18 | 39                  | 13 | 42                  | 22  | 43                    | 23  | 43                   | 26  | 39                   | 13  | 38                     | 12 |
| 3.33    | 42                                  | 22 | 40                  | 17 | 44                  | 27  | 44                    | 28  | 45                   | 31  | 41                   | 17  | 40                     | 16 |
| 3.42    | 44                                  | 28 | 42                  | 22 | 46                  | 33  | 46                    | 34  | 47                   | 37  | 43                   | 23  | 42                     | 21 |
| 3.50    | 46                                  | 33 | 44                  | 27 | 47                  | 39  | 47                    | 39  | 48                   | 43  | 44                   | 29  | 43                     | 26 |
| 3.58    | 47                                  | 39 | 46                  | 33 | 49                  | 45  | 49                    | 45  | 50                   | 49  | 46                   | 35  | 45                     | 31 |
| 3.67    | 49                                  | 46 | 47                  | 40 | 51                  | 52  | 51                    | 52  | 52                   | 56  | 48                   | 42  | 47                     | 38 |
| 3.75    | 51                                  | 52 | 49                  | 46 | 52                  | 59  | 52                    | 58  | 53                   | 62  | 50                   | 49  | 49                     | 44 |
| 3.83    | 52                                  | 59 | 51                  | 52 | 54                  | 65  | 54                    | 64  | 55                   | 68  | 52                   | 56  | 50                     | 51 |
| 3.92    | 54                                  | 65 | 52                  | 60 | 55                  | 71  | 55                    | 70  | 56                   | 74  | 53                   | 64  | 52                     | 58 |
| 4.00    | 55                                  | 71 | 54                  | 66 | 57                  | 76  | 57                    | 76  | 58                   | 78  | 55                   | 70  | 54                     | 64 |
| 4.08    | 57                                  | 76 | 56                  | 72 | 59                  | 81  | 58                    | 80  | 59                   | 83  | 57                   | 76  | 55                     | 70 |
| 4.17    | 59                                  | 81 | 58                  | 77 | 60                  | 85  | 60                    | 85  | 61                   | 87  | 59                   | 81  | 57                     | 76 |
| 4.25    | 60                                  | 85 | 59                  | 82 | 62                  | 88  | 62                    | 88  | 63                   | 90  | 61                   | 86  | 59                     | 81 |
| 4.33    | 62                                  | 88 | 61                  | 86 | 64                  | 91  | 63                    | 91  | 64                   | 92  | 62                   | 89  | 60                     | 85 |
| 4.42    | 64                                  | 92 | 63                  | 90 | 65                  | 94  | 65                    | 93  | 66                   | 94  | 64                   | 92  | 62                     | 89 |
| 4.50    | 65                                  | 94 | 64                  | 92 | 67                  | 95  | 67                    | 95  | 68                   | 96  | 66                   | 95  | 64                     | 92 |
| 4.58    | 67                                  | 95 | 66                  | 94 | 68                  | 97  | 68                    | 96  | 69                   | 97  | 68                   | 96  | 66                     | 94 |
| 4.67    | 69                                  | 97 | 68                  | 96 | 70                  | 98  | 70                    | 98  | 71                   | 98  | 70                   | 98  | 67                     | 96 |
| 4.75    | 70                                  | 98 | 69                  | 97 | 72                  | 99  | 71                    | 98  | 72                   | 99  | 72                   | 98  | 69                     | 97 |
| 4.83    | 72                                  | 99 | 71                  | 98 | 73                  | 99  | 73                    | 99  | 74                   | 99  | 73                   | 99  | 71                     | 98 |
| 4.92    | 74                                  | 99 | 73                  | 99 | 75                  | 99  | 75                    | 99  | 76                   | 99  | 75                   | 99  | 72                     | 99 |
| 5.00    | 75                                  | 99 | 74                  | 99 | 77                  | 100 | 76                    | 100 | 77                   | 100 | 77                   | 100 | 74                     | 99 |

Tabelle E13. Normwerte für Gewissenhaftigkeit

| Rohwert | Allgemeinbevölkerung<br>(N = 1 224) |    | Frauen<br>(N = 611) |    | Männer<br>(N = 613) |    | bis 30 J<br>(N = 296) |     | 31-40 J<br>(N = 224) |    | 41-50 J<br>(N = 269) |    | über 50 J<br>(N = 435) |    |
|---------|-------------------------------------|----|---------------------|----|---------------------|----|-----------------------|-----|----------------------|----|----------------------|----|------------------------|----|
|         | T                                   | PR | T                   | PR | T                   | PR | T                     | PR  | T                    | PR | T                    | PR | T                      | PR |
| 1.00    | 7                                   | 0  | 6                   | 0  | 6                   | 0  | 8                     | 0   | 6                    | 0  | 7                    | 0  | 3                      | 0  |
| 1.08    | 8                                   | 0  | 7                   | 0  | 8                   | 0  | 10                    | 0   | 7                    | 0  | 8                    | 0  | 4                      | 0  |
| 1.17    | 10                                  | 0  | 9                   | 0  | 9                   | 0  | 11                    | 0   | 8                    | 0  | 10                   | 0  | 5                      | 0  |
| 1.25    | 11                                  | 0  | 10                  | 0  | 11                  | 0  | 13                    | 0   | 10                   | 0  | 11                   | 0  | 7                      | 0  |
| 1.33    | 12                                  | 0  | 11                  | 0  | 12                  | 0  | 14                    | 0   | 11                   | 0  | 12                   | 0  | 8                      | 0  |
| 1.42    | 14                                  | 0  | 13                  | 0  | 14                  | 0  | 16                    | 0   | 13                   | 0  | 14                   | 0  | 10                     | 0  |
| 1.50    | 15                                  | 0  | 14                  | 0  | 15                  | 0  | 17                    | 0   | 14                   | 0  | 15                   | 0  | 11                     | 0  |
| 1.58    | 16                                  | 0  | 15                  | 0  | 16                  | 0  | 18                    | 0   | 16                   | 0  | 16                   | 0  | 12                     | 0  |
| 1.67    | 18                                  | 0  | 17                  | 0  | 18                  | 0  | 20                    | 0   | 17                   | 0  | 18                   | 0  | 14                     | 0  |
| 1.75    | 19                                  | 0  | 18                  | 0  | 19                  | 0  | 21                    | 0   | 18                   | 0  | 19                   | 0  | 15                     | 0  |
| 1.83    | 20                                  | 0  | 20                  | 0  | 21                  | 0  | 23                    | 0   | 20                   | 0  | 20                   | 0  | 17                     | 0  |
| 1.92    | 22                                  | 0  | 21                  | 0  | 22                  | 0  | 24                    | 0   | 21                   | 0  | 22                   | 0  | 18                     | 0  |
| 2.00    | 23                                  | 0  | 22                  | 0  | 23                  | 0  | 26                    | 1   | 23                   | 0  | 23                   | 0  | 19                     | 0  |
| 2.08    | 24                                  | 1  | 24                  | 0  | 25                  | 1  | 27                    | 1   | 24                   | 0  | 24                   | 1  | 21                     | 0  |
| 2.17    | 26                                  | 1  | 25                  | 1  | 26                  | 1  | 28                    | 2   | 26                   | 1  | 26                   | 1  | 22                     | 0  |
| 2.25    | 27                                  | 1  | 26                  | 1  | 28                  | 1  | 30                    | 2   | 27                   | 1  | 27                   | 1  | 24                     | 0  |
| 2.33    | 29                                  | 2  | 28                  | 1  | 29                  | 2  | 31                    | 3   | 28                   | 2  | 28                   | 1  | 25                     | 1  |
| 2.42    | 30                                  | 2  | 29                  | 2  | 31                  | 3  | 33                    | 4   | 30                   | 2  | 30                   | 2  | 27                     | 1  |
| 2.50    | 31                                  | 3  | 30                  | 2  | 32                  | 3  | 34                    | 6   | 31                   | 3  | 31                   | 3  | 28                     | 1  |
| 2.58    | 33                                  | 4  | 32                  | 3  | 33                  | 5  | 36                    | 7   | 33                   | 4  | 32                   | 4  | 29                     | 2  |
| 2.67    | 34                                  | 6  | 33                  | 5  | 35                  | 6  | 37                    | 10  | 34                   | 6  | 34                   | 5  | 31                     | 3  |
| 2.75    | 35                                  | 7  | 34                  | 6  | 36                  | 8  | 38                    | 12  | 36                   | 8  | 35                   | 7  | 32                     | 4  |
| 2.83    | 37                                  | 9  | 36                  | 8  | 37                  | 10 | 40                    | 15  | 37                   | 10 | 36                   | 8  | 34                     | 5  |
| 2.92    | 38                                  | 12 | 37                  | 10 | 39                  | 14 | 41                    | 19  | 39                   | 13 | 38                   | 11 | 35                     | 7  |
| 3.00    | 40                                  | 15 | 38                  | 12 | 40                  | 17 | 43                    | 23  | 40                   | 16 | 39                   | 13 | 36                     | 9  |
| 3.08    | 41                                  | 18 | 40                  | 15 | 42                  | 20 | 44                    | 28  | 41                   | 19 | 40                   | 16 | 38                     | 11 |
| 3.17    | 42                                  | 22 | 41                  | 19 | 43                  | 25 | 46                    | 33  | 43                   | 24 | 42                   | 20 | 39                     | 14 |
| 3.25    | 44                                  | 26 | 42                  | 22 | 45                  | 29 | 47                    | 38  | 44                   | 28 | 43                   | 24 | 41                     | 18 |
| 3.33    | 45                                  | 31 | 44                  | 26 | 46                  | 34 | 48                    | 44  | 46                   | 33 | 44                   | 28 | 42                     | 21 |
| 3.42    | 46                                  | 36 | 45                  | 31 | 47                  | 40 | 50                    | 50  | 47                   | 39 | 46                   | 33 | 44                     | 26 |
| 3.50    | 48                                  | 41 | 46                  | 36 | 49                  | 45 | 51                    | 55  | 49                   | 45 | 47                   | 38 | 45                     | 31 |
| 3.58    | 49                                  | 46 | 48                  | 41 | 50                  | 51 | 53                    | 61  | 50                   | 50 | 48                   | 42 | 46                     | 35 |
| 3.67    | 50                                  | 52 | 49                  | 47 | 52                  | 57 | 54                    | 67  | 52                   | 56 | 50                   | 48 | 48                     | 41 |
| 3.75    | 52                                  | 57 | 50                  | 52 | 53                  | 62 | 56                    | 72  | 53                   | 62 | 51                   | 53 | 49                     | 47 |
| 3.83    | 53                                  | 62 | 52                  | 57 | 54                  | 67 | 57                    | 76  | 54                   | 67 | 52                   | 58 | 51                     | 52 |
| 3.92    | 55                                  | 68 | 53                  | 63 | 56                  | 72 | 59                    | 81  | 56                   | 72 | 53                   | 64 | 52                     | 58 |
| 4.00    | 56                                  | 72 | 55                  | 67 | 57                  | 77 | 60                    | 84  | 57                   | 77 | 55                   | 68 | 53                     | 63 |
| 4.08    | 57                                  | 76 | 56                  | 72 | 59                  | 81 | 61                    | 87  | 59                   | 81 | 56                   | 73 | 55                     | 68 |
| 4.17    | 59                                  | 81 | 57                  | 77 | 60                  | 85 | 63                    | 90  | 60                   | 85 | 57                   | 77 | 56                     | 73 |
| 4.25    | 60                                  | 84 | 59                  | 80 | 62                  | 88 | 64                    | 92  | 62                   | 88 | 59                   | 81 | 58                     | 78 |
| 4.33    | 61                                  | 87 | 60                  | 84 | 63                  | 90 | 66                    | 94  | 63                   | 90 | 60                   | 84 | 59                     | 82 |
| 4.42    | 63                                  | 90 | 61                  | 87 | 64                  | 93 | 67                    | 96  | 64                   | 93 | 61                   | 87 | 61                     | 85 |
| 4.50    | 64                                  | 92 | 63                  | 90 | 66                  | 94 | 69                    | 97  | 66                   | 94 | 63                   | 90 | 62                     | 88 |
| 4.58    | 65                                  | 94 | 64                  | 92 | 67                  | 96 | 70                    | 98  | 67                   | 96 | 64                   | 92 | 63                     | 91 |
| 4.67    | 67                                  | 95 | 65                  | 94 | 69                  | 97 | 72                    | 98  | 69                   | 97 | 65                   | 94 | 65                     | 93 |
| 4.75    | 68                                  | 97 | 67                  | 95 | 70                  | 98 | 73                    | 99  | 70                   | 98 | 67                   | 95 | 66                     | 95 |
| 4.83    | 70                                  | 97 | 68                  | 96 | 71                  | 98 | 74                    | 99  | 72                   | 98 | 68                   | 96 | 67                     | 96 |
| 4.92    | 71                                  | 98 | 69                  | 97 | 73                  | 99 | 76                    | 100 | 73                   | 99 | 69                   | 97 | 69                     | 97 |
| 5.00    | 72                                  | 99 | 71                  | 98 | 74                  | 99 | 77                    | 100 | 74                   | 99 | 71                   | 98 | 70                     | 98 |

Tabelle E14. Normwerte für Negative Emotionalität

| Rohwert | Allgemeinbevölkerung<br>(N = 1 224) |     | Frauen<br>(N = 611) |     | Männer<br>(N = 613) |     | bis 30 J<br>(N = 296) |     | 31-40 J<br>(N = 224) |     | 41-50 J<br>(N = 269) |     | über 50 J<br>(N = 435) |     |
|---------|-------------------------------------|-----|---------------------|-----|---------------------|-----|-----------------------|-----|----------------------|-----|----------------------|-----|------------------------|-----|
|         | T                                   | PR  | T                   | PR  | T                   | PR  | T                     | PR  | T                    | PR  | T                    | PR  | T                      | PR  |
| 1.00    | 25                                  | 1   | 24                  | 1   | 26                  | 1   | 23                    | 0   | 23                   | 0   | 24                   | 1   | 26                     | 1   |
| 1.08    | 26                                  | 1   | 25                  | 1   | 27                  | 1   | 25                    | 1   | 25                   | 1   | 26                   | 1   | 27                     | 1   |
| 1.17    | 28                                  | 1   | 27                  | 1   | 28                  | 1   | 26                    | 1   | 26                   | 1   | 27                   | 1   | 28                     | 1   |
| 1.25    | 29                                  | 2   | 28                  | 1   | 29                  | 2   | 27                    | 1   | 27                   | 1   | 28                   | 1   | 30                     | 2   |
| 1.33    | 30                                  | 2   | 29                  | 2   | 30                  | 3   | 28                    | 1   | 28                   | 1   | 29                   | 2   | 31                     | 3   |
| 1.42    | 31                                  | 3   | 30                  | 2   | 32                  | 3   | 29                    | 2   | 29                   | 2   | 31                   | 3   | 32                     | 4   |
| 1.50    | 32                                  | 4   | 31                  | 3   | 33                  | 4   | 30                    | 3   | 30                   | 3   | 32                   | 3   | 33                     | 5   |
| 1.58    | 33                                  | 5   | 33                  | 4   | 34                  | 6   | 32                    | 3   | 32                   | 3   | 33                   | 4   | 35                     | 6   |
| 1.67    | 35                                  | 6   | 34                  | 5   | 35                  | 7   | 33                    | 4   | 33                   | 4   | 34                   | 6   | 36                     | 8   |
| 1.75    | 36                                  | 8   | 35                  | 7   | 37                  | 9   | 34                    | 5   | 34                   | 5   | 35                   | 7   | 37                     | 10  |
| 1.83    | 37                                  | 10  | 36                  | 8   | 38                  | 11  | 35                    | 7   | 35                   | 7   | 37                   | 9   | 39                     | 13  |
| 1.92    | 38                                  | 12  | 37                  | 10  | 39                  | 14  | 36                    | 9   | 36                   | 8   | 38                   | 11  | 40                     | 16  |
| 2.00    | 39                                  | 15  | 38                  | 12  | 40                  | 17  | 37                    | 11  | 37                   | 10  | 39                   | 14  | 41                     | 20  |
| 2.08    | 41                                  | 17  | 40                  | 15  | 41                  | 20  | 39                    | 13  | 38                   | 12  | 40                   | 17  | 43                     | 23  |
| 2.17    | 42                                  | 21  | 41                  | 18  | 43                  | 24  | 40                    | 16  | 40                   | 15  | 42                   | 20  | 44                     | 28  |
| 2.25    | 43                                  | 24  | 42                  | 21  | 44                  | 27  | 41                    | 18  | 41                   | 18  | 43                   | 24  | 45                     | 32  |
| 2.33    | 44                                  | 28  | 43                  | 25  | 45                  | 31  | 42                    | 22  | 42                   | 21  | 44                   | 27  | 47                     | 37  |
| 2.42    | 45                                  | 32  | 44                  | 29  | 46                  | 36  | 43                    | 25  | 43                   | 25  | 45                   | 32  | 48                     | 42  |
| 2.50    | 47                                  | 37  | 45                  | 33  | 48                  | 41  | 45                    | 29  | 44                   | 28  | 46                   | 36  | 49                     | 47  |
| 2.58    | 48                                  | 41  | 47                  | 37  | 49                  | 45  | 46                    | 33  | 45                   | 32  | 48                   | 41  | 51                     | 53  |
| 2.67    | 49                                  | 46  | 48                  | 42  | 50                  | 51  | 47                    | 38  | 47                   | 37  | 49                   | 46  | 52                     | 58  |
| 2.75    | 50                                  | 51  | 49                  | 46  | 51                  | 55  | 48                    | 42  | 48                   | 41  | 50                   | 51  | 53                     | 63  |
| 2.83    | 51                                  | 55  | 50                  | 51  | 53                  | 60  | 49                    | 47  | 49                   | 46  | 51                   | 55  | 55                     | 68  |
| 2.92    | 53                                  | 60  | 51                  | 56  | 54                  | 65  | 50                    | 52  | 50                   | 51  | 53                   | 60  | 56                     | 73  |
| 3.00    | 54                                  | 64  | 53                  | 60  | 55                  | 69  | 52                    | 56  | 51                   | 55  | 54                   | 65  | 57                     | 77  |
| 3.08    | 55                                  | 69  | 54                  | 64  | 56                  | 73  | 53                    | 61  | 52                   | 59  | 55                   | 69  | 59                     | 80  |
| 3.17    | 56                                  | 73  | 55                  | 69  | 58                  | 77  | 54                    | 65  | 54                   | 64  | 56                   | 74  | 60                     | 84  |
| 3.25    | 57                                  | 77  | 56                  | 73  | 59                  | 81  | 55                    | 69  | 55                   | 68  | 58                   | 77  | 61                     | 87  |
| 3.33    | 58                                  | 80  | 57                  | 76  | 60                  | 84  | 56                    | 73  | 56                   | 72  | 59                   | 81  | 63                     | 90  |
| 3.42    | 60                                  | 83  | 58                  | 80  | 61                  | 87  | 57                    | 77  | 57                   | 76  | 60                   | 84  | 64                     | 92  |
| 3.50    | 61                                  | 86  | 60                  | 83  | 62                  | 89  | 59                    | 80  | 58                   | 79  | 61                   | 87  | 65                     | 94  |
| 3.58    | 62                                  | 88  | 61                  | 86  | 64                  | 91  | 60                    | 83  | 59                   | 82  | 62                   | 89  | 67                     | 95  |
| 3.67    | 63                                  | 91  | 62                  | 88  | 65                  | 93  | 61                    | 86  | 61                   | 85  | 64                   | 91  | 68                     | 96  |
| 3.75    | 64                                  | 93  | 63                  | 90  | 66                  | 95  | 62                    | 89  | 62                   | 88  | 65                   | 93  | 69                     | 97  |
| 3.83    | 66                                  | 94  | 64                  | 92  | 67                  | 96  | 63                    | 91  | 63                   | 90  | 66                   | 95  | 70                     | 98  |
| 3.92    | 67                                  | 95  | 65                  | 94  | 69                  | 97  | 65                    | 93  | 64                   | 92  | 67                   | 96  | 72                     | 99  |
| 4.00    | 68                                  | 96  | 67                  | 95  | 70                  | 98  | 66                    | 94  | 65                   | 93  | 69                   | 97  | 73                     | 99  |
| 4.08    | 69                                  | 97  | 68                  | 96  | 71                  | 98  | 67                    | 95  | 66                   | 95  | 70                   | 98  | 74                     | 99  |
| 4.17    | 70                                  | 98  | 69                  | 97  | 72                  | 99  | 68                    | 96  | 68                   | 96  | 71                   | 98  | 76                     | 100 |
| 4.25    | 72                                  | 98  | 70                  | 98  | 73                  | 99  | 69                    | 97  | 69                   | 97  | 72                   | 99  | 77                     | 100 |
| 4.33    | 73                                  | 99  | 71                  | 98  | 75                  | 99  | 70                    | 98  | 70                   | 98  | 73                   | 99  | 78                     | 100 |
| 4.42    | 74                                  | 99  | 73                  | 99  | 76                  | 100 | 72                    | 98  | 71                   | 98  | 75                   | 99  | 80                     | 100 |
| 4.50    | 75                                  | 99  | 74                  | 99  | 77                  | 100 | 73                    | 99  | 72                   | 99  | 76                   | 100 | 81                     | 100 |
| 4.58    | 76                                  | 100 | 75                  | 99  | 78                  | 100 | 74                    | 99  | 73                   | 99  | 77                   | 100 | 82                     | 100 |
| 4.67    | 78                                  | 100 | 76                  | 100 | 80                  | 100 | 75                    | 99  | 74                   | 99  | 78                   | 100 | 84                     | 100 |
| 4.75    | 79                                  | 100 | 77                  | 100 | 81                  | 100 | 76                    | 100 | 76                   | 99  | 80                   | 100 | 85                     | 100 |
| 4.83    | 80                                  | 100 | 78                  | 100 | 82                  | 100 | 77                    | 100 | 77                   | 100 | 81                   | 100 | 86                     | 100 |
| 4.92    | 81                                  | 100 | 80                  | 100 | 83                  | 100 | 79                    | 100 | 78                   | 100 | 82                   | 100 | 88                     | 100 |
| 5.00    | 82                                  | 100 | 81                  | 100 | 84                  | 100 | 80                    | 100 | 79                   | 100 | 83                   | 100 | 89                     | 100 |

Tabelle E15. Normwerte für Offenheit

| Rohwert | Allgemeinbevölkerung<br>(N = 1 224) |    | Frauen<br>(N = 611) |    | Männer<br>(N = 613) |     | bis 30 J<br>(N = 296) |     | 31-40 J<br>(N = 224) |     | 41-50 J<br>(N = 269) |    | über 50 J<br>(N = 435) |    |
|---------|-------------------------------------|----|---------------------|----|---------------------|-----|-----------------------|-----|----------------------|-----|----------------------|----|------------------------|----|
|         | T                                   | PR | T                   | PR | T                   | PR  | T                     | PR  | T                    | PR  | T                    | PR | T                      | PR |
| 1.00    | 15                                  | 0  | 15                  | 0  | 14                  | 0   | 16                    | 0   | 16                   | 0   | 16                   | 0  | 11                     | 0  |
| 1.08    | 16                                  | 0  | 17                  | 0  | 15                  | 0   | 18                    | 0   | 17                   | 0   | 18                   | 0  | 12                     | 0  |
| 1.17    | 17                                  | 0  | 18                  | 0  | 17                  | 0   | 19                    | 0   | 18                   | 0   | 19                   | 0  | 14                     | 0  |
| 1.25    | 18                                  | 0  | 19                  | 0  | 18                  | 0   | 20                    | 0   | 20                   | 0   | 20                   | 0  | 15                     | 0  |
| 1.33    | 20                                  | 0  | 20                  | 0  | 19                  | 0   | 21                    | 0   | 21                   | 0   | 21                   | 0  | 16                     | 0  |
| 1.42    | 21                                  | 0  | 21                  | 0  | 20                  | 0   | 23                    | 0   | 22                   | 0   | 22                   | 0  | 18                     | 0  |
| 1.50    | 22                                  | 0  | 23                  | 0  | 22                  | 0   | 24                    | 0   | 23                   | 0   | 24                   | 0  | 19                     | 0  |
| 1.58    | 23                                  | 0  | 24                  | 0  | 23                  | 0   | 25                    | 1   | 25                   | 1   | 25                   | 1  | 20                     | 0  |
| 1.67    | 25                                  | 1  | 25                  | 1  | 24                  | 1   | 26                    | 1   | 26                   | 1   | 26                   | 1  | 22                     | 0  |
| 1.75    | 26                                  | 1  | 26                  | 1  | 26                  | 1   | 28                    | 1   | 27                   | 1   | 27                   | 1  | 23                     | 0  |
| 1.83    | 27                                  | 1  | 27                  | 1  | 27                  | 1   | 29                    | 2   | 28                   | 2   | 28                   | 2  | 24                     | 1  |
| 1.92    | 28                                  | 2  | 29                  | 2  | 28                  | 2   | 30                    | 2   | 30                   | 2   | 30                   | 2  | 26                     | 1  |
| 2.00    | 30                                  | 2  | 30                  | 2  | 30                  | 2   | 31                    | 3   | 31                   | 3   | 31                   | 3  | 27                     | 1  |
| 2.08    | 31                                  | 3  | 31                  | 3  | 31                  | 3   | 33                    | 4   | 32                   | 4   | 32                   | 4  | 28                     | 1  |
| 2.17    | 32                                  | 4  | 32                  | 4  | 32                  | 4   | 34                    | 5   | 33                   | 5   | 33                   | 5  | 30                     | 2  |
| 2.25    | 33                                  | 5  | 33                  | 5  | 34                  | 5   | 35                    | 7   | 35                   | 6   | 34                   | 6  | 31                     | 3  |
| 2.33    | 35                                  | 6  | 35                  | 6  | 35                  | 7   | 36                    | 8   | 36                   | 8   | 36                   | 8  | 32                     | 4  |
| 2.42    | 36                                  | 8  | 36                  | 8  | 36                  | 9   | 38                    | 11  | 37                   | 10  | 37                   | 10 | 34                     | 5  |
| 2.50    | 37                                  | 10 | 37                  | 10 | 38                  | 11  | 39                    | 13  | 38                   | 12  | 38                   | 12 | 35                     | 7  |
| 2.58    | 38                                  | 12 | 38                  | 12 | 39                  | 13  | 40                    | 16  | 40                   | 15  | 39                   | 14 | 36                     | 8  |
| 2.67    | 40                                  | 16 | 40                  | 15 | 40                  | 17  | 41                    | 19  | 41                   | 19  | 41                   | 17 | 38                     | 11 |
| 2.75    | 41                                  | 19 | 41                  | 18 | 42                  | 20  | 43                    | 23  | 42                   | 22  | 42                   | 20 | 39                     | 13 |
| 2.83    | 42                                  | 22 | 42                  | 21 | 43                  | 24  | 44                    | 27  | 43                   | 26  | 43                   | 24 | 40                     | 16 |
| 2.92    | 44                                  | 26 | 43                  | 25 | 44                  | 28  | 45                    | 31  | 45                   | 30  | 44                   | 28 | 42                     | 20 |
| 3.00    | 45                                  | 30 | 44                  | 29 | 46                  | 33  | 46                    | 35  | 46                   | 35  | 45                   | 32 | 43                     | 24 |
| 3.08    | 46                                  | 35 | 46                  | 33 | 47                  | 38  | 47                    | 40  | 47                   | 39  | 47                   | 36 | 44                     | 28 |
| 3.17    | 47                                  | 40 | 47                  | 37 | 48                  | 43  | 49                    | 45  | 49                   | 45  | 48                   | 41 | 46                     | 33 |
| 3.25    | 49                                  | 45 | 48                  | 42 | 50                  | 48  | 50                    | 50  | 50                   | 49  | 49                   | 46 | 47                     | 38 |
| 3.33    | 50                                  | 49 | 49                  | 47 | 51                  | 53  | 51                    | 55  | 51                   | 54  | 50                   | 51 | 48                     | 42 |
| 3.42    | 51                                  | 55 | 50                  | 52 | 52                  | 59  | 53                    | 60  | 52                   | 60  | 51                   | 56 | 50                     | 48 |
| 3.50    | 52                                  | 60 | 52                  | 56 | 53                  | 64  | 54                    | 65  | 54                   | 64  | 53                   | 60 | 51                     | 53 |
| 3.58    | 54                                  | 64 | 53                  | 61 | 55                  | 68  | 55                    | 69  | 55                   | 69  | 54                   | 65 | 52                     | 58 |
| 3.67    | 55                                  | 69 | 54                  | 66 | 56                  | 73  | 56                    | 73  | 56                   | 73  | 55                   | 69 | 53                     | 64 |
| 3.75    | 56                                  | 73 | 55                  | 70 | 57                  | 77  | 57                    | 77  | 57                   | 77  | 56                   | 73 | 55                     | 68 |
| 3.83    | 57                                  | 77 | 56                  | 74 | 59                  | 81  | 59                    | 81  | 59                   | 81  | 57                   | 77 | 56                     | 73 |
| 3.92    | 59                                  | 81 | 58                  | 78 | 60                  | 85  | 60                    | 84  | 60                   | 84  | 59                   | 81 | 57                     | 77 |
| 4.00    | 60                                  | 84 | 59                  | 81 | 61                  | 87  | 61                    | 87  | 61                   | 87  | 60                   | 84 | 59                     | 81 |
| 4.08    | 61                                  | 87 | 60                  | 84 | 63                  | 90  | 62                    | 89  | 62                   | 89  | 61                   | 86 | 60                     | 84 |
| 4.17    | 63                                  | 90 | 61                  | 87 | 64                  | 92  | 64                    | 92  | 64                   | 92  | 62                   | 89 | 61                     | 87 |
| 4.25    | 64                                  | 92 | 62                  | 89 | 65                  | 94  | 65                    | 93  | 65                   | 93  | 63                   | 91 | 63                     | 90 |
| 4.33    | 65                                  | 93 | 64                  | 91 | 67                  | 95  | 66                    | 95  | 66                   | 95  | 65                   | 93 | 64                     | 92 |
| 4.42    | 66                                  | 95 | 65                  | 93 | 68                  | 96  | 67                    | 96  | 68                   | 96  | 66                   | 94 | 65                     | 94 |
| 4.50    | 68                                  | 96 | 66                  | 95 | 69                  | 97  | 69                    | 97  | 69                   | 97  | 67                   | 96 | 67                     | 95 |
| 4.58    | 69                                  | 97 | 67                  | 96 | 71                  | 98  | 70                    | 98  | 70                   | 98  | 68                   | 97 | 68                     | 96 |
| 4.67    | 70                                  | 98 | 69                  | 97 | 72                  | 99  | 71                    | 98  | 71                   | 98  | 70                   | 97 | 69                     | 97 |
| 4.75    | 71                                  | 98 | 70                  | 98 | 73                  | 99  | 72                    | 99  | 73                   | 99  | 71                   | 98 | 71                     | 98 |
| 4.83    | 73                                  | 99 | 71                  | 98 | 75                  | 99  | 74                    | 99  | 74                   | 99  | 72                   | 99 | 72                     | 99 |
| 4.92    | 74                                  | 99 | 72                  | 99 | 76                  | 100 | 75                    | 99  | 75                   | 99  | 73                   | 99 | 73                     | 99 |
| 5.00    | 75                                  | 99 | 73                  | 99 | 77                  | 100 | 76                    | 100 | 76                   | 100 | 74                   | 99 | 75                     | 99 |

Tabelle E16. Normwerte für Geselligkeit

| Rohwert | Allgemeinbevölkerung<br>(N = 1 224) |    | Frauen<br>(N = 611) |    | Männer<br>(N = 613) |    | bis 30 J<br>(N = 296) |    | 31-40 J<br>(N = 224) |    | 41-50 J<br>(N = 269) |    | über 50 J<br>(N = 435) |    |
|---------|-------------------------------------|----|---------------------|----|---------------------|----|-----------------------|----|----------------------|----|----------------------|----|------------------------|----|
|         | T                                   | PR | T                   | PR | T                   | PR | T                     | PR | T                    | PR | T                    | PR | T                      | PR |
| 1.00    | 23                                  | 0  | 22                  | 0  | 24                  | 0  | 25                    | 1  | 27                   | 1  | 23                   | 0  | 19                     | 0  |
| 1.25    | 26                                  | 1  | 25                  | 1  | 27                  | 1  | 28                    | 1  | 30                   | 2  | 26                   | 1  | 22                     | 0  |
| 1.50    | 30                                  | 2  | 28                  | 1  | 30                  | 2  | 31                    | 3  | 33                   | 4  | 29                   | 2  | 26                     | 1  |
| 1.75    | 33                                  | 4  | 31                  | 3  | 33                  | 5  | 34                    | 5  | 35                   | 7  | 32                   | 4  | 29                     | 2  |
| 2.00    | 36                                  | 8  | 34                  | 6  | 37                  | 9  | 37                    | 9  | 38                   | 11 | 35                   | 7  | 33                     | 4  |
| 2.25    | 39                                  | 13 | 37                  | 10 | 40                  | 15 | 40                    | 15 | 41                   | 17 | 38                   | 12 | 36                     | 8  |
| 2.50    | 42                                  | 20 | 40                  | 16 | 43                  | 24 | 43                    | 23 | 43                   | 25 | 41                   | 19 | 40                     | 15 |
| 2.75    | 45                                  | 30 | 43                  | 25 | 46                  | 35 | 46                    | 33 | 46                   | 35 | 44                   | 29 | 43                     | 24 |
| 3.00    | 48                                  | 41 | 46                  | 35 | 49                  | 47 | 48                    | 44 | 49                   | 45 | 47                   | 40 | 46                     | 36 |
| 3.25    | 51                                  | 53 | 49                  | 47 | 53                  | 60 | 51                    | 56 | 52                   | 56 | 50                   | 52 | 50                     | 49 |
| 3.50    | 54                                  | 65 | 52                  | 59 | 56                  | 72 | 54                    | 67 | 54                   | 66 | 54                   | 64 | 53                     | 63 |
| 3.75    | 57                                  | 76 | 55                  | 70 | 59                  | 82 | 57                    | 77 | 57                   | 76 | 57                   | 74 | 57                     | 75 |
| 4.00    | 60                                  | 84 | 58                  | 79 | 62                  | 89 | 60                    | 85 | 60                   | 83 | 60                   | 83 | 60                     | 84 |
| 4.25    | 63                                  | 90 | 61                  | 87 | 65                  | 94 | 63                    | 91 | 62                   | 89 | 63                   | 90 | 64                     | 91 |
| 4.50    | 66                                  | 95 | 64                  | 92 | 69                  | 97 | 66                    | 95 | 65                   | 93 | 66                   | 94 | 67                     | 96 |
| 4.75    | 69                                  | 97 | 67                  | 96 | 72                  | 99 | 69                    | 97 | 68                   | 96 | 69                   | 97 | 70                     | 98 |
| 5.00    | 72                                  | 99 | 70                  | 98 | 75                  | 99 | 72                    | 99 | 71                   | 98 | 72                   | 99 | 74                     | 99 |

Tabelle E17. Normwerte für Durchsetzungsfähigkeit

| Rohwert | Allgemeinbevölkerung<br>(N = 1 224) |    | Frauen<br>(N = 611) |    | Männer<br>(N = 613) |    | bis 30 J<br>(N = 296) |    | 31-40 J<br>(N = 224) |    | 41-50 J<br>(N = 269) |    | über 50 J<br>(N = 435) |    |
|---------|-------------------------------------|----|---------------------|----|---------------------|----|-----------------------|----|----------------------|----|----------------------|----|------------------------|----|
|         | T                                   | PR | T                   | PR | T                   | PR | T                     | PR | T                    | PR | T                    | PR | T                      | PR |
| 1.00    | 21                                  | 0  | 21                  | 0  | 20                  | 0  | 20                    | 0  | 23                   | 0  | 21                   | 0  | 20                     | 0  |
| 1.25    | 24                                  | 0  | 25                  | 1  | 23                  | 0  | 23                    | 0  | 26                   | 1  | 24                   | 0  | 23                     | 0  |
| 1.50    | 27                                  | 1  | 28                  | 1  | 27                  | 1  | 27                    | 1  | 29                   | 2  | 28                   | 1  | 27                     | 1  |
| 1.75    | 31                                  | 3  | 31                  | 3  | 30                  | 2  | 30                    | 2  | 32                   | 4  | 31                   | 3  | 30                     | 2  |
| 2.00    | 34                                  | 6  | 35                  | 6  | 33                  | 5  | 33                    | 5  | 36                   | 7  | 34                   | 6  | 34                     | 5  |
| 2.25    | 37                                  | 11 | 38                  | 11 | 37                  | 9  | 37                    | 9  | 39                   | 13 | 38                   | 11 | 37                     | 10 |
| 2.50    | 41                                  | 18 | 41                  | 19 | 40                  | 17 | 40                    | 16 | 42                   | 21 | 41                   | 19 | 40                     | 17 |
| 2.75    | 44                                  | 28 | 44                  | 29 | 44                  | 26 | 43                    | 26 | 45                   | 31 | 44                   | 29 | 44                     | 27 |
| 3.00    | 47                                  | 40 | 48                  | 41 | 47                  | 39 | 47                    | 37 | 48                   | 43 | 48                   | 41 | 47                     | 39 |
| 3.25    | 51                                  | 53 | 51                  | 54 | 51                  | 52 | 50                    | 51 | 51                   | 56 | 51                   | 55 | 51                     | 53 |
| 3.50    | 54                                  | 66 | 54                  | 67 | 54                  | 65 | 53                    | 64 | 55                   | 68 | 55                   | 68 | 54                     | 66 |
| 3.75    | 57                                  | 77 | 58                  | 78 | 57                  | 77 | 57                    | 75 | 58                   | 78 | 58                   | 79 | 58                     | 77 |
| 4.00    | 61                                  | 86 | 61                  | 86 | 61                  | 86 | 60                    | 84 | 61                   | 86 | 61                   | 87 | 61                     | 86 |
| 4.25    | 64                                  | 92 | 64                  | 92 | 64                  | 92 | 63                    | 91 | 64                   | 92 | 65                   | 93 | 64                     | 92 |
| 4.50    | 67                                  | 96 | 68                  | 96 | 68                  | 96 | 67                    | 95 | 67                   | 96 | 68                   | 96 | 68                     | 96 |
| 4.75    | 71                                  | 98 | 71                  | 98 | 71                  | 98 | 70                    | 98 | 70                   | 98 | 71                   | 98 | 71                     | 98 |
| 5.00    | 74                                  | 99 | 74                  | 99 | 75                  | 99 | 73                    | 99 | 74                   | 99 | 75                   | 99 | 75                     | 99 |

Tabelle E18. Normwerte für Energie

| Rohwert | Allgemeinbevölkerung<br>(N = 1 224) |     | Frauen<br>(N = 611) |    | Männer<br>(N = 613) |     | bis 30 J<br>(N = 296) |     | 31-40 J<br>(N = 224) |    | 41-50 J<br>(N = 269) |    | über 50 J<br>(N = 435) |     |
|---------|-------------------------------------|-----|---------------------|----|---------------------|-----|-----------------------|-----|----------------------|----|----------------------|----|------------------------|-----|
|         | T                                   | PR  | T                   | PR | T                   | PR  | T                     | PR  | T                    | PR | T                    | PR | T                      | PR  |
| 1.00    | 18                                  | 0   | 16                  | 0  | 19                  | 0   | 17                    | 0   | 21                   | 0  | 18                   | 0  | 16                     | 0   |
| 1.25    | 21                                  | 0   | 20                  | 0  | 23                  | 0   | 21                    | 0   | 25                   | 1  | 21                   | 0  | 20                     | 0   |
| 1.50    | 25                                  | 1   | 24                  | 0  | 26                  | 1   | 24                    | 1   | 28                   | 1  | 25                   | 1  | 24                     | 0   |
| 1.75    | 29                                  | 2   | 27                  | 1  | 30                  | 2   | 28                    | 1   | 31                   | 3  | 29                   | 2  | 28                     | 1   |
| 2.00    | 32                                  | 4   | 31                  | 3  | 34                  | 5   | 32                    | 3   | 35                   | 6  | 32                   | 4  | 31                     | 3   |
| 2.25    | 36                                  | 8   | 34                  | 6  | 37                  | 10  | 35                    | 7   | 38                   | 11 | 36                   | 8  | 35                     | 7   |
| 2.50    | 40                                  | 15  | 38                  | 12 | 41                  | 18  | 39                    | 14  | 41                   | 19 | 39                   | 14 | 39                     | 14  |
| 2.75    | 43                                  | 25  | 42                  | 20 | 45                  | 30  | 43                    | 24  | 44                   | 29 | 43                   | 24 | 43                     | 24  |
| 3.00    | 47                                  | 37  | 45                  | 32 | 48                  | 44  | 46                    | 36  | 48                   | 41 | 46                   | 36 | 47                     | 37  |
| 3.25    | 50                                  | 52  | 49                  | 46 | 52                  | 58  | 50                    | 51  | 51                   | 54 | 50                   | 50 | 51                     | 52  |
| 3.50    | 54                                  | 66  | 53                  | 60 | 56                  | 72  | 54                    | 65  | 54                   | 67 | 54                   | 64 | 54                     | 67  |
| 3.75    | 58                                  | 78  | 56                  | 73 | 59                  | 83  | 58                    | 77  | 58                   | 78 | 57                   | 76 | 58                     | 80  |
| 4.00    | 61                                  | 87  | 60                  | 84 | 63                  | 90  | 61                    | 87  | 61                   | 86 | 61                   | 86 | 62                     | 89  |
| 4.25    | 65                                  | 93  | 63                  | 91 | 67                  | 95  | 65                    | 93  | 64                   | 92 | 64                   | 92 | 66                     | 95  |
| 4.50    | 69                                  | 97  | 67                  | 96 | 70                  | 98  | 69                    | 97  | 68                   | 96 | 68                   | 96 | 70                     | 98  |
| 4.75    | 72                                  | 99  | 71                  | 98 | 74                  | 99  | 72                    | 99  | 71                   | 98 | 71                   | 98 | 74                     | 99  |
| 5.00    | 76                                  | 100 | 74                  | 99 | 78                  | 100 | 76                    | 100 | 74                   | 99 | 75                   | 99 | 78                     | 100 |

Tabelle E19. Normwerte für Mitgefühl

| Rohwert | Allgemeinbevölkerung<br>(N = 1 224) |    | Frauen<br>(N = 611) |    | Männer<br>(N = 613) |    | bis 30 J<br>(N = 296) |    | 31-40 J<br>(N = 224) |    | 41-50 J<br>(N = 269) |    | über 50 J<br>(N = 435) |    |
|---------|-------------------------------------|----|---------------------|----|---------------------|----|-----------------------|----|----------------------|----|----------------------|----|------------------------|----|
|         | T                                   | PR | T                   | PR | T                   | PR | T                     | PR | T                    | PR | T                    | PR | T                      | PR |
| 1.00    | 6                                   | 0  | 0                   | 0  | 8                   | 0  | 9                     | 0  | 10                   | 0  | 3                    | 0  | 0                      | 0  |
| 1.25    | 9                                   | 0  | 4                   | 0  | 12                  | 0  | 13                    | 0  | 14                   | 0  | 7                    | 0  | 4                      | 0  |
| 1.50    | 13                                  | 0  | 8                   | 0  | 15                  | 0  | 16                    | 0  | 17                   | 0  | 11                   | 0  | 9                      | 0  |
| 1.75    | 17                                  | 0  | 12                  | 0  | 19                  | 0  | 20                    | 0  | 21                   | 0  | 15                   | 0  | 13                     | 0  |
| 2.00    | 21                                  | 0  | 16                  | 0  | 23                  | 0  | 23                    | 0  | 24                   | 1  | 19                   | 0  | 17                     | 0  |
| 2.25    | 25                                  | 1  | 20                  | 0  | 27                  | 1  | 27                    | 1  | 28                   | 1  | 23                   | 0  | 21                     | 0  |
| 2.50    | 28                                  | 2  | 24                  | 0  | 31                  | 3  | 30                    | 3  | 31                   | 3  | 27                   | 1  | 25                     | 1  |
| 2.75    | 32                                  | 4  | 28                  | 1  | 34                  | 6  | 34                    | 5  | 35                   | 7  | 31                   | 3  | 29                     | 2  |
| 3.00    | 36                                  | 8  | 32                  | 4  | 38                  | 12 | 37                    | 11 | 39                   | 13 | 35                   | 6  | 33                     | 5  |
| 3.25    | 40                                  | 15 | 36                  | 9  | 42                  | 21 | 41                    | 18 | 42                   | 22 | 39                   | 13 | 37                     | 10 |
| 3.50    | 43                                  | 26 | 40                  | 17 | 46                  | 34 | 45                    | 29 | 46                   | 33 | 43                   | 23 | 41                     | 19 |
| 3.75    | 47                                  | 39 | 44                  | 29 | 50                  | 48 | 48                    | 42 | 49                   | 47 | 47                   | 37 | 45                     | 32 |
| 4.00    | 51                                  | 54 | 48                  | 44 | 53                  | 63 | 52                    | 56 | 53                   | 61 | 51                   | 53 | 50                     | 48 |
| 4.25    | 55                                  | 69 | 52                  | 60 | 57                  | 76 | 55                    | 69 | 56                   | 74 | 55                   | 68 | 54                     | 64 |
| 4.50    | 59                                  | 81 | 56                  | 74 | 61                  | 86 | 59                    | 80 | 60                   | 84 | 59                   | 80 | 58                     | 78 |
| 4.75    | 62                                  | 89 | 60                  | 85 | 65                  | 93 | 62                    | 89 | 64                   | 91 | 63                   | 90 | 62                     | 88 |
| 5.00    | 66                                  | 95 | 65                  | 93 | 68                  | 97 | 66                    | 94 | 67                   | 96 | 67                   | 95 | 66                     | 94 |

Tabelle E20. Normwerte für Respekt

| Rohwert | Allgemeinbevölkerung<br>(N = 1 224) |    | Frauen<br>(N = 611) |    | Männer<br>(N = 613) |    | bis 30 J<br>(N = 296) |    | 31-40 J<br>(N = 224) |    | 41-50 J<br>(N = 269) |    | über 50 J<br>(N = 435) |    |
|---------|-------------------------------------|----|---------------------|----|---------------------|----|-----------------------|----|----------------------|----|----------------------|----|------------------------|----|
|         | T                                   | PR | T                   | PR | T                   | PR | T                     | PR | T                    | PR | T                    | PR | T                      | PR |
| 1.00    | 0                                   | 0  | 0                   | 0  | 0                   | 0  | 1                     | 0  | 2                    | 0  | 0                    | 0  | 0                      | 0  |
| 1.25    | 3                                   | 0  | 1                   | 0  | 4                   | 0  | 5                     | 0  | 6                    | 0  | 0                    | 0  | 0                      | 0  |
| 1.50    | 7                                   | 0  | 5                   | 0  | 8                   | 0  | 9                     | 0  | 10                   | 0  | 2                    | 0  | 4                      | 0  |
| 1.75    | 11                                  | 0  | 9                   | 0  | 13                  | 0  | 13                    | 0  | 14                   | 0  | 6                    | 0  | 8                      | 0  |
| 2.00    | 15                                  | 0  | 13                  | 0  | 17                  | 0  | 17                    | 0  | 19                   | 0  | 11                   | 0  | 13                     | 0  |
| 2.25    | 19                                  | 0  | 18                  | 0  | 21                  | 0  | 22                    | 0  | 23                   | 0  | 16                   | 0  | 17                     | 0  |
| 2.50    | 24                                  | 0  | 22                  | 0  | 25                  | 1  | 26                    | 1  | 27                   | 1  | 20                   | 0  | 21                     | 0  |
| 2.75    | 28                                  | 1  | 26                  | 1  | 29                  | 2  | 30                    | 2  | 31                   | 3  | 25                   | 1  | 26                     | 1  |
| 3.00    | 32                                  | 4  | 31                  | 3  | 33                  | 5  | 34                    | 5  | 35                   | 7  | 29                   | 2  | 30                     | 2  |
| 3.25    | 36                                  | 9  | 35                  | 7  | 38                  | 11 | 38                    | 12 | 39                   | 14 | 34                   | 6  | 34                     | 6  |
| 3.50    | 41                                  | 18 | 39                  | 14 | 42                  | 20 | 42                    | 22 | 43                   | 25 | 39                   | 13 | 38                     | 12 |
| 3.75    | 45                                  | 31 | 44                  | 26 | 46                  | 34 | 47                    | 36 | 47                   | 39 | 43                   | 25 | 43                     | 23 |
| 4.00    | 49                                  | 47 | 48                  | 42 | 50                  | 50 | 51                    | 53 | 51                   | 55 | 48                   | 42 | 47                     | 38 |
| 4.25    | 53                                  | 63 | 52                  | 59 | 54                  | 66 | 55                    | 69 | 55                   | 71 | 53                   | 60 | 51                     | 55 |
| 4.50    | 58                                  | 78 | 57                  | 74 | 58                  | 80 | 59                    | 82 | 60                   | 83 | 57                   | 76 | 56                     | 72 |
| 4.75    | 62                                  | 88 | 61                  | 86 | 63                  | 89 | 63                    | 91 | 64                   | 91 | 62                   | 88 | 60                     | 84 |
| 5.00    | 66                                  | 95 | 65                  | 94 | 67                  | 95 | 67                    | 96 | 68                   | 96 | 66                   | 95 | 64                     | 92 |

Tabelle E21. Normwerte für Vertrauen

| Rohwert | Allgemeinbevölkerung<br>(N = 1 224) |     | Frauen<br>(N = 611) |     | Männer<br>(N = 613) |     | bis 30 J<br>(N = 296) |     | 31-40 J<br>(N = 224) |     | 41-50 J<br>(N = 269) |     | über 50 J<br>(N = 435) |     |
|---------|-------------------------------------|-----|---------------------|-----|---------------------|-----|-----------------------|-----|----------------------|-----|----------------------|-----|------------------------|-----|
|         | T                                   | PR  | T                   | PR  | T                   | PR  | T                     | PR  | T                    | PR  | T                    | PR  | T                      | PR  |
| 1.00    | 16                                  | 0   | 16                  | 0   | 16                  | 0   | 18                    | 0   | 20                   | 0   | 14                   | 0   | 13                     | 0   |
| 1.25    | 20                                  | 0   | 20                  | 0   | 20                  | 0   | 22                    | 0   | 23                   | 0   | 18                   | 0   | 17                     | 0   |
| 1.50    | 24                                  | 0   | 23                  | 0   | 24                  | 0   | 25                    | 1   | 27                   | 1   | 22                   | 0   | 21                     | 0   |
| 1.75    | 28                                  | 1   | 27                  | 1   | 28                  | 1   | 29                    | 2   | 31                   | 3   | 26                   | 1   | 25                     | 1   |
| 2.00    | 32                                  | 3   | 31                  | 3   | 32                  | 4   | 33                    | 5   | 34                   | 6   | 30                   | 2   | 30                     | 2   |
| 2.25    | 36                                  | 8   | 35                  | 7   | 36                  | 8   | 37                    | 10  | 38                   | 12  | 34                   | 6   | 34                     | 5   |
| 2.50    | 40                                  | 15  | 39                  | 14  | 40                  | 15  | 41                    | 19  | 42                   | 21  | 38                   | 12  | 38                     | 11  |
| 2.75    | 44                                  | 26  | 43                  | 25  | 44                  | 27  | 45                    | 31  | 46                   | 33  | 42                   | 23  | 42                     | 21  |
| 3.00    | 48                                  | 41  | 47                  | 39  | 48                  | 41  | 49                    | 46  | 49                   | 48  | 47                   | 37  | 46                     | 34  |
| 3.25    | 52                                  | 56  | 51                  | 55  | 52                  | 56  | 53                    | 61  | 53                   | 62  | 51                   | 53  | 50                     | 50  |
| 3.50    | 56                                  | 71  | 55                  | 70  | 55                  | 71  | 57                    | 75  | 57                   | 75  | 55                   | 68  | 54                     | 66  |
| 3.75    | 60                                  | 83  | 59                  | 82  | 59                  | 83  | 61                    | 86  | 61                   | 86  | 59                   | 81  | 58                     | 79  |
| 4.00    | 63                                  | 91  | 63                  | 91  | 63                  | 91  | 65                    | 93  | 64                   | 92  | 63                   | 90  | 62                     | 89  |
| 4.25    | 67                                  | 96  | 67                  | 96  | 67                  | 96  | 68                    | 97  | 68                   | 96  | 67                   | 96  | 66                     | 95  |
| 4.50    | 71                                  | 98  | 71                  | 98  | 71                  | 98  | 72                    | 99  | 72                   | 99  | 71                   | 98  | 70                     | 98  |
| 4.75    | 75                                  | 99  | 75                  | 99  | 75                  | 99  | 76                    | 100 | 76                   | 99  | 75                   | 99  | 75                     | 99  |
| 5.00    | 79                                  | 100 | 79                  | 100 | 79                  | 100 | 80                    | 100 | 79                   | 100 | 79                   | 100 | 79                     | 100 |



Tabelle E22. Normwerte für Ordnungsliebe

| Rohwert | Allgemeinbevölkerung<br>(N = 1 224) |    | Frauen<br>(N = 611) |    | Männer<br>(N = 613) |    | bis 30 J<br>(N = 296) |    | 31-40 J<br>(N = 224) |    | 41-50 J<br>(N = 269) |    | über 50 J<br>(N = 435) |    |
|---------|-------------------------------------|----|---------------------|----|---------------------|----|-----------------------|----|----------------------|----|----------------------|----|------------------------|----|
|         | T                                   | PR | T                   | PR | T                   | PR | T                     | PR | T                    | PR | T                    | PR | T                      | PR |
| 1.00    | 19                                  | 0  | 18                  | 0  | 19                  | 0  | 23                    | 0  | 19                   | 0  | 19                   | 0  | 15                     | 0  |
| 1.25    | 22                                  | 0  | 21                  | 0  | 22                  | 0  | 26                    | 1  | 22                   | 0  | 22                   | 0  | 18                     | 0  |
| 1.50    | 25                                  | 1  | 24                  | 0  | 25                  | 1  | 28                    | 2  | 25                   | 1  | 24                   | 1  | 21                     | 0  |
| 1.75    | 28                                  | 1  | 27                  | 1  | 28                  | 1  | 31                    | 3  | 28                   | 1  | 27                   | 1  | 24                     | 0  |
| 2.00    | 31                                  | 3  | 30                  | 2  | 31                  | 3  | 34                    | 5  | 30                   | 3  | 30                   | 2  | 27                     | 1  |
| 2.25    | 33                                  | 5  | 33                  | 4  | 34                  | 6  | 37                    | 9  | 33                   | 5  | 33                   | 5  | 30                     | 2  |
| 2.50    | 36                                  | 9  | 36                  | 8  | 37                  | 10 | 40                    | 15 | 36                   | 9  | 36                   | 8  | 33                     | 5  |
| 2.75    | 39                                  | 14 | 39                  | 13 | 40                  | 16 | 42                    | 22 | 39                   | 14 | 39                   | 13 | 37                     | 9  |
| 3.00    | 42                                  | 22 | 41                  | 19 | 43                  | 24 | 45                    | 31 | 42                   | 22 | 42                   | 20 | 40                     | 15 |
| 3.25    | 45                                  | 31 | 44                  | 28 | 46                  | 34 | 48                    | 42 | 45                   | 32 | 45                   | 29 | 43                     | 23 |
| 3.50    | 48                                  | 42 | 47                  | 39 | 49                  | 45 | 51                    | 53 | 48                   | 43 | 47                   | 40 | 46                     | 34 |
| 3.75    | 51                                  | 54 | 50                  | 50 | 52                  | 57 | 53                    | 63 | 51                   | 55 | 50                   | 51 | 49                     | 46 |
| 4.00    | 54                                  | 65 | 53                  | 61 | 55                  | 68 | 56                    | 73 | 54                   | 67 | 53                   | 63 | 52                     | 58 |
| 4.25    | 57                                  | 75 | 56                  | 72 | 58                  | 78 | 59                    | 82 | 57                   | 77 | 56                   | 73 | 55                     | 70 |
| 4.50    | 60                                  | 83 | 59                  | 81 | 61                  | 86 | 62                    | 88 | 60                   | 85 | 59                   | 82 | 58                     | 80 |
| 4.75    | 63                                  | 90 | 61                  | 87 | 64                  | 91 | 65                    | 93 | 63                   | 91 | 62                   | 88 | 62                     | 87 |
| 5.00    | 65                                  | 94 | 64                  | 92 | 66                  | 95 | 67                    | 96 | 66                   | 95 | 65                   | 93 | 65                     | 93 |

Tabelle E23. Normwerte für Fleiß

| Rohwert | Allgemeinbevölkerung<br>(N = 1 224) |    | Frauen<br>(N = 611) |    | Männer<br>(N = 613) |    | bis 30 J<br>(N = 296) |     | 31-40 J<br>(N = 224) |    | 41-50 J<br>(N = 269) |    | über 50 J<br>(N = 435) |    |
|---------|-------------------------------------|----|---------------------|----|---------------------|----|-----------------------|-----|----------------------|----|----------------------|----|------------------------|----|
|         | T                                   | PR | T                   | PR | T                   | PR | T                     | PR  | T                    | PR | T                    | PR | T                      | PR |
| 1.00    | 15                                  | 0  | 16                  | 0  | 15                  | 0  | 16                    | 0   | 15                   | 0  | 15                   | 0  | 13                     | 0  |
| 1.25    | 19                                  | 0  | 19                  | 0  | 19                  | 0  | 20                    | 0   | 19                   | 0  | 18                   | 0  | 17                     | 0  |
| 1.50    | 22                                  | 0  | 22                  | 0  | 22                  | 0  | 24                    | 0   | 22                   | 0  | 22                   | 0  | 20                     | 0  |
| 1.75    | 26                                  | 1  | 26                  | 1  | 26                  | 1  | 28                    | 1   | 26                   | 1  | 25                   | 1  | 24                     | 0  |
| 2.00    | 29                                  | 2  | 29                  | 2  | 29                  | 2  | 31                    | 3   | 29                   | 2  | 28                   | 2  | 27                     | 1  |
| 2.25    | 33                                  | 4  | 32                  | 4  | 33                  | 4  | 35                    | 7   | 33                   | 4  | 32                   | 4  | 31                     | 3  |
| 2.50    | 36                                  | 8  | 36                  | 8  | 37                  | 9  | 39                    | 13  | 36                   | 9  | 35                   | 7  | 34                     | 6  |
| 2.75    | 40                                  | 15 | 39                  | 14 | 40                  | 16 | 43                    | 23  | 40                   | 16 | 39                   | 13 | 38                     | 11 |
| 3.00    | 43                                  | 25 | 43                  | 23 | 44                  | 26 | 46                    | 35  | 44                   | 26 | 42                   | 22 | 41                     | 19 |
| 3.25    | 47                                  | 37 | 46                  | 34 | 47                  | 39 | 50                    | 50  | 47                   | 39 | 46                   | 33 | 45                     | 30 |
| 3.50    | 50                                  | 51 | 49                  | 47 | 51                  | 53 | 54                    | 65  | 51                   | 53 | 49                   | 46 | 48                     | 43 |
| 3.75    | 54                                  | 65 | 53                  | 61 | 54                  | 67 | 57                    | 77  | 54                   | 67 | 52                   | 60 | 52                     | 57 |
| 4.00    | 57                                  | 77 | 56                  | 73 | 58                  | 79 | 61                    | 87  | 58                   | 78 | 56                   | 72 | 55                     | 70 |
| 4.25    | 61                                  | 86 | 59                  | 83 | 62                  | 88 | 65                    | 93  | 61                   | 87 | 59                   | 82 | 59                     | 81 |
| 4.50    | 64                                  | 92 | 63                  | 90 | 65                  | 94 | 69                    | 97  | 65                   | 93 | 63                   | 90 | 62                     | 89 |
| 4.75    | 68                                  | 96 | 66                  | 95 | 69                  | 97 | 72                    | 99  | 69                   | 97 | 66                   | 95 | 66                     | 94 |
| 5.00    | 71                                  | 98 | 70                  | 97 | 72                  | 99 | 76                    | 100 | 72                   | 99 | 70                   | 97 | 69                     | 97 |

Tabelle E24. Normwerte für Verlässlichkeit

| Rohwert | Allgemeinbevölkerung<br>(N = 1 224) |    | Frauen<br>(N = 611) |    | Männer<br>(N = 613) |    | bis 30 J<br>(N = 296) |    | 31-40 J<br>(N = 224) |    | 41-50 J<br>(N = 269) |    | über 50 J<br>(N = 435) |    |
|---------|-------------------------------------|----|---------------------|----|---------------------|----|-----------------------|----|----------------------|----|----------------------|----|------------------------|----|
|         | T                                   | PR | T                   | PR | T                   | PR | T                     | PR | T                    | PR | T                    | PR | T                      | PR |
| 1.00    | 3                                   | 0  | 1                   | 0  | 3                   | 0  | 4                     | 0  | 6                    | 0  | 2                    | 0  | 0                      | 0  |
| 1.25    | 7                                   | 0  | 6                   | 0  | 8                   | 0  | 9                     | 0  | 10                   | 0  | 7                    | 0  | 1                      | 0  |
| 1.50    | 11                                  | 0  | 10                  | 0  | 12                  | 0  | 13                    | 0  | 14                   | 0  | 11                   | 0  | 6                      | 0  |
| 1.75    | 16                                  | 0  | 14                  | 0  | 16                  | 0  | 18                    | 0  | 18                   | 0  | 15                   | 0  | 10                     | 0  |
| 2.00    | 20                                  | 0  | 18                  | 0  | 21                  | 0  | 22                    | 0  | 22                   | 0  | 19                   | 0  | 15                     | 0  |
| 2.25    | 24                                  | 0  | 23                  | 0  | 25                  | 1  | 27                    | 1  | 27                   | 1  | 24                   | 0  | 19                     | 0  |
| 2.50    | 28                                  | 2  | 27                  | 1  | 30                  | 2  | 31                    | 3  | 31                   | 3  | 28                   | 1  | 24                     | 0  |
| 2.75    | 33                                  | 4  | 31                  | 3  | 34                  | 6  | 36                    | 7  | 35                   | 6  | 32                   | 4  | 29                     | 2  |
| 3.00    | 37                                  | 10 | 35                  | 7  | 38                  | 12 | 40                    | 16 | 39                   | 14 | 36                   | 8  | 33                     | 5  |
| 3.25    | 41                                  | 19 | 39                  | 15 | 43                  | 24 | 44                    | 29 | 43                   | 25 | 41                   | 17 | 38                     | 11 |
| 3.50    | 46                                  | 33 | 44                  | 27 | 47                  | 39 | 49                    | 46 | 47                   | 39 | 45                   | 30 | 42                     | 22 |
| 3.75    | 50                                  | 50 | 48                  | 42 | 52                  | 56 | 53                    | 63 | 52                   | 56 | 49                   | 46 | 47                     | 37 |
| 4.00    | 54                                  | 67 | 52                  | 59 | 56                  | 72 | 58                    | 78 | 56                   | 71 | 53                   | 63 | 51                     | 55 |
| 4.25    | 59                                  | 81 | 56                  | 74 | 60                  | 85 | 62                    | 89 | 60                   | 84 | 57                   | 77 | 56                     | 72 |
| 4.50    | 63                                  | 90 | 61                  | 86 | 65                  | 93 | 67                    | 95 | 64                   | 92 | 62                   | 88 | 60                     | 85 |
| 4.75    | 67                                  | 96 | 65                  | 93 | 69                  | 97 | 71                    | 98 | 68                   | 97 | 66                   | 94 | 65                     | 93 |
| 5.00    | 72                                  | 98 | 69                  | 97 | 74                  | 99 | 76                    | 99 | 72                   | 99 | 70                   | 98 | 69                     | 97 |

Tabelle E25. Normwerte für Ängstlichkeit

| Rohwert | Allgemeinbevölkerung<br>(N = 1 224) |     | Frauen<br>(N = 611) |     | Männer<br>(N = 613) |     | bis 30 J<br>(N = 296) |     | 31-40 J<br>(N = 224) |    | 41-50 J<br>(N = 269) |     | über 50 J<br>(N = 435) |     |
|---------|-------------------------------------|-----|---------------------|-----|---------------------|-----|-----------------------|-----|----------------------|----|----------------------|-----|------------------------|-----|
|         | T                                   | PR  | T                   | PR  | T                   | PR  | T                     | PR  | T                    | PR | T                    | PR  | T                      | PR  |
| 1.00    | 23                                  | 0   | 21                  | 0   | 24                  | 0   | 22                    | 0   | 21                   | 0  | 23                   | 0   | 23                     | 0   |
| 1.25    | 26                                  | 1   | 24                  | 1   | 28                  | 1   | 25                    | 1   | 25                   | 1  | 26                   | 1   | 27                     | 1   |
| 1.50    | 29                                  | 2   | 28                  | 1   | 31                  | 3   | 29                    | 2   | 28                   | 1  | 30                   | 2   | 31                     | 3   |
| 1.75    | 33                                  | 4   | 31                  | 3   | 35                  | 6   | 32                    | 4   | 32                   | 3  | 33                   | 5   | 34                     | 6   |
| 2.00    | 36                                  | 9   | 35                  | 7   | 38                  | 12  | 35                    | 7   | 35                   | 7  | 37                   | 9   | 38                     | 12  |
| 2.25    | 40                                  | 16  | 38                  | 12  | 42                  | 20  | 39                    | 13  | 38                   | 12 | 40                   | 16  | 42                     | 21  |
| 2.50    | 43                                  | 25  | 42                  | 21  | 45                  | 32  | 42                    | 22  | 42                   | 20 | 43                   | 26  | 46                     | 33  |
| 2.75    | 47                                  | 37  | 45                  | 33  | 49                  | 45  | 46                    | 34  | 45                   | 31 | 47                   | 38  | 49                     | 47  |
| 3.00    | 50                                  | 51  | 49                  | 46  | 52                  | 59  | 49                    | 47  | 49                   | 44 | 50                   | 51  | 53                     | 62  |
| 3.25    | 54                                  | 65  | 53                  | 60  | 56                  | 72  | 53                    | 60  | 52                   | 58 | 54                   | 64  | 57                     | 75  |
| 3.50    | 57                                  | 76  | 56                  | 73  | 59                  | 82  | 56                    | 73  | 55                   | 70 | 57                   | 76  | 60                     | 85  |
| 3.75    | 61                                  | 86  | 60                  | 83  | 63                  | 90  | 59                    | 83  | 59                   | 81 | 61                   | 85  | 64                     | 92  |
| 4.00    | 64                                  | 92  | 63                  | 90  | 66                  | 95  | 63                    | 90  | 62                   | 89 | 64                   | 92  | 68                     | 96  |
| 4.25    | 68                                  | 96  | 67                  | 95  | 70                  | 98  | 66                    | 95  | 65                   | 94 | 67                   | 96  | 72                     | 98  |
| 4.50    | 71                                  | 98  | 70                  | 98  | 73                  | 99  | 70                    | 98  | 69                   | 97 | 71                   | 98  | 75                     | 99  |
| 4.75    | 75                                  | 99  | 74                  | 99  | 77                  | 100 | 73                    | 99  | 72                   | 99 | 74                   | 99  | 79                     | 100 |
| 5.00    | 78                                  | 100 | 77                  | 100 | 80                  | 100 | 77                    | 100 | 76                   | 99 | 78                   | 100 | 83                     | 100 |

Tabelle E26. Normwerte für Niedergeschlagenheit

| Rohwert | Allgemeinbevölkerung<br>(N = 1 224) |     | Frauen<br>(N = 611) |     | Männer<br>(N = 613) |     | bis 30 J<br>(N = 296) |    | 31-40 J<br>(N = 224) |    | 41-50 J<br>(N = 269) |     | über 50 J<br>(N = 435) |     |
|---------|-------------------------------------|-----|---------------------|-----|---------------------|-----|-----------------------|----|----------------------|----|----------------------|-----|------------------------|-----|
|         | T                                   | PR  | T                   | PR  | T                   | PR  | T                     | PR | T                    | PR | T                    | PR  | T                      | PR  |
| 1.00    | 32                                  | 4   | 32                  | 4   | 31                  | 3   | 30                    | 2  | 32                   | 3  | 32                   | 3   | 32                     | 4   |
| 1.25    | 35                                  | 6   | 35                  | 6   | 34                  | 6   | 33                    | 4  | 34                   | 6  | 35                   | 6   | 35                     | 7   |
| 1.50    | 38                                  | 11  | 37                  | 10  | 37                  | 10  | 36                    | 8  | 37                   | 10 | 37                   | 10  | 38                     | 12  |
| 1.75    | 40                                  | 17  | 40                  | 16  | 40                  | 16  | 39                    | 13 | 40                   | 15 | 40                   | 17  | 41                     | 19  |
| 2.00    | 43                                  | 25  | 43                  | 24  | 43                  | 25  | 41                    | 19 | 42                   | 22 | 43                   | 25  | 45                     | 29  |
| 2.25    | 46                                  | 34  | 46                  | 34  | 46                  | 35  | 44                    | 28 | 45                   | 31 | 46                   | 35  | 48                     | 41  |
| 2.50    | 49                                  | 45  | 49                  | 44  | 49                  | 47  | 47                    | 38 | 48                   | 41 | 49                   | 46  | 51                     | 54  |
| 2.75    | 52                                  | 56  | 51                  | 55  | 52                  | 59  | 50                    | 49 | 50                   | 52 | 52                   | 58  | 54                     | 66  |
| 3.00    | 54                                  | 67  | 54                  | 66  | 55                  | 70  | 53                    | 60 | 53                   | 62 | 55                   | 69  | 57                     | 76  |
| 3.25    | 57                                  | 76  | 57                  | 75  | 58                  | 80  | 55                    | 71 | 56                   | 72 | 58                   | 78  | 60                     | 85  |
| 3.50    | 60                                  | 84  | 60                  | 83  | 61                  | 87  | 58                    | 79 | 58                   | 80 | 61                   | 86  | 64                     | 91  |
| 3.75    | 63                                  | 90  | 62                  | 89  | 64                  | 92  | 61                    | 86 | 61                   | 87 | 64                   | 91  | 67                     | 95  |
| 4.00    | 66                                  | 94  | 65                  | 94  | 67                  | 96  | 64                    | 92 | 64                   | 92 | 67                   | 95  | 70                     | 98  |
| 4.25    | 68                                  | 97  | 68                  | 96  | 70                  | 98  | 67                    | 95 | 67                   | 95 | 69                   | 97  | 73                     | 99  |
| 4.50    | 71                                  | 98  | 71                  | 98  | 73                  | 99  | 69                    | 97 | 69                   | 97 | 72                   | 99  | 76                     | 100 |
| 4.75    | 74                                  | 99  | 74                  | 99  | 76                  | 100 | 72                    | 99 | 72                   | 99 | 75                   | 99  | 79                     | 100 |
| 5.00    | 77                                  | 100 | 76                  | 100 | 79                  | 100 | 75                    | 99 | 75                   | 99 | 78                   | 100 | 83                     | 100 |

Tabelle E27. Normwerte für Unbeständigkeit

| Rohwert | Allgemeinbevölkerung<br>(N = 1 224) |     | Frauen<br>(N = 611) |     | Männer<br>(N = 613) |     | bis 30 J<br>(N = 296) |    | 31-40 J<br>(N = 224) |    | 41-50 J<br>(N = 269) |     | über 50 J<br>(N = 435) |     |
|---------|-------------------------------------|-----|---------------------|-----|---------------------|-----|-----------------------|----|----------------------|----|----------------------|-----|------------------------|-----|
|         | T                                   | PR  | T                   | PR  | T                   | PR  | T                     | PR | T                    | PR | T                    | PR  | T                      | PR  |
| 1.00    | 29                                  | 2   | 29                  | 2   | 30                  | 2   | 28                    | 2  | 27                   | 1  | 28                   | 1   | 31                     | 3   |
| 1.25    | 32                                  | 4   | 32                  | 3   | 33                  | 5   | 31                    | 3  | 30                   | 2  | 31                   | 3   | 35                     | 6   |
| 1.50    | 35                                  | 7   | 35                  | 7   | 37                  | 9   | 34                    | 6  | 33                   | 5  | 34                   | 6   | 38                     | 11  |
| 1.75    | 38                                  | 12  | 38                  | 11  | 40                  | 15  | 37                    | 10 | 36                   | 8  | 38                   | 11  | 41                     | 19  |
| 2.00    | 42                                  | 20  | 41                  | 18  | 43                  | 24  | 40                    | 16 | 39                   | 14 | 41                   | 19  | 45                     | 30  |
| 2.25    | 45                                  | 30  | 44                  | 28  | 46                  | 35  | 43                    | 24 | 42                   | 22 | 44                   | 29  | 48                     | 42  |
| 2.50    | 48                                  | 41  | 47                  | 38  | 49                  | 47  | 46                    | 34 | 45                   | 32 | 48                   | 41  | 51                     | 56  |
| 2.75    | 51                                  | 53  | 50                  | 50  | 52                  | 60  | 49                    | 46 | 48                   | 43 | 51                   | 55  | 55                     | 69  |
| 3.00    | 54                                  | 66  | 53                  | 62  | 56                  | 71  | 52                    | 57 | 51                   | 55 | 55                   | 68  | 58                     | 80  |
| 3.25    | 57                                  | 76  | 56                  | 73  | 59                  | 81  | 55                    | 69 | 54                   | 67 | 58                   | 79  | 62                     | 88  |
| 3.50    | 60                                  | 85  | 59                  | 82  | 62                  | 88  | 58                    | 78 | 57                   | 77 | 61                   | 87  | 65                     | 93  |
| 3.75    | 63                                  | 91  | 62                  | 89  | 65                  | 93  | 61                    | 86 | 60                   | 85 | 65                   | 93  | 68                     | 97  |
| 4.00    | 67                                  | 95  | 65                  | 94  | 68                  | 97  | 64                    | 91 | 63                   | 91 | 68                   | 96  | 72                     | 99  |
| 4.25    | 70                                  | 98  | 68                  | 97  | 71                  | 98  | 67                    | 95 | 66                   | 95 | 71                   | 98  | 75                     | 99  |
| 4.50    | 73                                  | 99  | 71                  | 98  | 75                  | 99  | 70                    | 97 | 69                   | 97 | 75                   | 99  | 79                     | 100 |
| 4.75    | 76                                  | 100 | 75                  | 99  | 78                  | 100 | 72                    | 99 | 72                   | 99 | 78                   | 100 | 82                     | 100 |
| 5.00    | 79                                  | 100 | 78                  | 100 | 81                  | 100 | 75                    | 99 | 75                   | 99 | 82                   | 100 | 85                     | 100 |

Tabelle E28. Normwerte für Neugierde

| Rohwert | Allgemeinbevölkerung<br>(N = 1 224) |    | Frauen<br>(N = 611) |    | Männer<br>(N = 613) |    | bis 30 J<br>(N = 296) |    | 31-40 J<br>(N = 224) |    | 41-50 J<br>(N = 269) |    | über 50 J<br>(N = 435) |    |
|---------|-------------------------------------|----|---------------------|----|---------------------|----|-----------------------|----|----------------------|----|----------------------|----|------------------------|----|
|         | T                                   | PR | T                   | PR | T                   | PR | T                     | PR | T                    | PR | T                    | PR | T                      | PR |
| 1.00    | 15                                  | 0  | 15                  | 0  | 15                  | 0  | 17                    | 0  | 16                   | 0  | 15                   | 0  | 13                     | 0  |
| 1.25    | 19                                  | 0  | 19                  | 0  | 19                  | 0  | 21                    | 0  | 19                   | 0  | 19                   | 0  | 17                     | 0  |
| 1.50    | 22                                  | 0  | 22                  | 0  | 22                  | 0  | 24                    | 0  | 23                   | 0  | 22                   | 0  | 21                     | 0  |
| 1.75    | 26                                  | 1  | 26                  | 1  | 26                  | 1  | 27                    | 1  | 26                   | 1  | 26                   | 1  | 24                     | 0  |
| 2.00    | 29                                  | 2  | 29                  | 2  | 29                  | 2  | 31                    | 3  | 30                   | 2  | 29                   | 2  | 28                     | 1  |
| 2.25    | 33                                  | 4  | 33                  | 4  | 33                  | 4  | 34                    | 6  | 34                   | 5  | 33                   | 4  | 31                     | 3  |
| 2.50    | 36                                  | 9  | 36                  | 8  | 36                  | 9  | 38                    | 11 | 37                   | 10 | 36                   | 8  | 35                     | 7  |
| 2.75    | 40                                  | 16 | 40                  | 15 | 40                  | 16 | 41                    | 19 | 41                   | 17 | 40                   | 15 | 39                     | 13 |
| 3.00    | 43                                  | 25 | 43                  | 25 | 44                  | 26 | 45                    | 29 | 44                   | 28 | 43                   | 25 | 42                     | 22 |
| 3.25    | 47                                  | 38 | 47                  | 37 | 47                  | 38 | 48                    | 42 | 48                   | 41 | 47                   | 37 | 46                     | 34 |
| 3.50    | 50                                  | 52 | 50                  | 51 | 51                  | 52 | 51                    | 55 | 51                   | 54 | 50                   | 51 | 50                     | 48 |
| 3.75    | 54                                  | 65 | 54                  | 65 | 54                  | 66 | 55                    | 68 | 55                   | 68 | 54                   | 64 | 53                     | 63 |
| 4.00    | 57                                  | 77 | 57                  | 77 | 58                  | 78 | 58                    | 79 | 58                   | 79 | 57                   | 76 | 57                     | 75 |
| 4.25    | 61                                  | 86 | 61                  | 86 | 61                  | 87 | 62                    | 88 | 62                   | 88 | 61                   | 85 | 60                     | 85 |
| 4.50    | 65                                  | 93 | 64                  | 92 | 65                  | 93 | 65                    | 93 | 65                   | 94 | 64                   | 92 | 64                     | 92 |
| 4.75    | 68                                  | 96 | 68                  | 96 | 68                  | 97 | 68                    | 97 | 69                   | 97 | 68                   | 96 | 68                     | 96 |
| 5.00    | 72                                  | 98 | 71                  | 98 | 72                  | 98 | 72                    | 99 | 72                   | 99 | 71                   | 98 | 71                     | 98 |

Tabelle E29. Normwerte für Ästhetisches Empfinden

| Rohwert | Allgemeinbevölkerung<br>(N = 1 224) |    | Frauen<br>(N = 611) |    | Männer<br>(N = 613) |    | bis 30 J<br>(N = 296) |    | 31-40 J<br>(N = 224) |    | 41-50 J<br>(N = 269) |    | über 50 J<br>(N = 435) |    |
|---------|-------------------------------------|----|---------------------|----|---------------------|----|-----------------------|----|----------------------|----|----------------------|----|------------------------|----|
|         | T                                   | PR | T                   | PR | T                   | PR | T                     | PR | T                    | PR | T                    | PR | T                      | PR |
| 1.00    | 29                                  | 2  | 28                  | 1  | 30                  | 2  | 31                    | 3  | 30                   | 2  | 31                   | 3  | 26                     | 1  |
| 1.25    | 32                                  | 4  | 30                  | 2  | 33                  | 4  | 33                    | 5  | 33                   | 4  | 33                   | 5  | 29                     | 2  |
| 1.50    | 34                                  | 6  | 33                  | 4  | 36                  | 7  | 36                    | 8  | 35                   | 7  | 36                   | 8  | 31                     | 3  |
| 1.75    | 37                                  | 10 | 35                  | 7  | 38                  | 12 | 38                    | 12 | 38                   | 11 | 38                   | 12 | 34                     | 6  |
| 2.00    | 40                                  | 15 | 38                  | 11 | 41                  | 18 | 41                    | 18 | 40                   | 17 | 41                   | 17 | 37                     | 9  |
| 2.25    | 42                                  | 22 | 41                  | 17 | 43                  | 25 | 43                    | 25 | 43                   | 24 | 43                   | 24 | 39                     | 15 |
| 2.50    | 45                                  | 30 | 43                  | 24 | 46                  | 34 | 46                    | 34 | 45                   | 32 | 45                   | 32 | 42                     | 22 |
| 2.75    | 47                                  | 39 | 46                  | 33 | 49                  | 44 | 48                    | 44 | 48                   | 42 | 48                   | 42 | 45                     | 30 |
| 3.00    | 50                                  | 49 | 48                  | 43 | 51                  | 55 | 51                    | 54 | 51                   | 52 | 50                   | 51 | 48                     | 41 |
| 3.25    | 52                                  | 59 | 51                  | 53 | 54                  | 65 | 54                    | 64 | 53                   | 62 | 53                   | 61 | 50                     | 51 |
| 3.50    | 55                                  | 69 | 53                  | 63 | 56                  | 74 | 56                    | 73 | 56                   | 71 | 55                   | 70 | 53                     | 62 |
| 3.75    | 57                                  | 77 | 56                  | 72 | 59                  | 81 | 59                    | 81 | 58                   | 79 | 58                   | 78 | 56                     | 72 |
| 4.00    | 60                                  | 84 | 58                  | 80 | 62                  | 88 | 61                    | 87 | 61                   | 86 | 60                   | 84 | 58                     | 80 |
| 4.25    | 63                                  | 90 | 61                  | 86 | 64                  | 92 | 64                    | 92 | 63                   | 91 | 62                   | 89 | 61                     | 87 |
| 4.50    | 65                                  | 93 | 63                  | 91 | 67                  | 95 | 66                    | 95 | 66                   | 94 | 65                   | 93 | 64                     | 92 |
| 4.75    | 68                                  | 96 | 66                  | 95 | 69                  | 97 | 69                    | 97 | 68                   | 97 | 67                   | 96 | 67                     | 95 |
| 5.00    | 70                                  | 98 | 69                  | 97 | 72                  | 99 | 71                    | 98 | 71                   | 98 | 70                   | 98 | 69                     | 97 |

Tabelle E30. Normwerte für Einfallsreichtum

| Rohwert | Allgemeinbevölkerung<br>(N = 1 224) |    | Frauen<br>(N = 611) |    | Männer<br>(N = 613) |    | bis 30 J<br>(N = 296) |    | 31-40 J<br>(N = 224) |    | 41-50 J<br>(N = 269) |    | über 50 J<br>(N = 435) |     |
|---------|-------------------------------------|----|---------------------|----|---------------------|----|-----------------------|----|----------------------|----|----------------------|----|------------------------|-----|
|         | T                                   | PR | T                   | PR | T                   | PR | T                     | PR | T                    | PR | T                    | PR | T                      | PR  |
| 1.00    | 18                                  | 0  | 19                  | 0  | 17                  | 0  | 20                    | 0  | 20                   | 0  | 17                   | 0  | 55                     | 70  |
| 1.25    | 21                                  | 0  | 22                  | 0  | 20                  | 0  | 23                    | 0  | 23                   | 0  | 21                   | 0  | 59                     | 81  |
| 1.50    | 24                                  | 1  | 25                  | 1  | 24                  | 0  | 26                    | 1  | 26                   | 1  | 24                   | 0  | 62                     | 88  |
| 1.75    | 28                                  | 1  | 28                  | 1  | 27                  | 1  | 29                    | 2  | 29                   | 2  | 27                   | 1  | 65                     | 94  |
| 2.00    | 31                                  | 3  | 31                  | 3  | 30                  | 2  | 32                    | 4  | 32                   | 4  | 30                   | 2  | 69                     | 97  |
| 2.25    | 34                                  | 5  | 34                  | 6  | 34                  | 5  | 35                    | 7  | 36                   | 7  | 34                   | 5  | 72                     | 99  |
| 2.50    | 37                                  | 10 | 37                  | 10 | 37                  | 9  | 38                    | 12 | 39                   | 13 | 37                   | 9  | 75                     | 99  |
| 2.75    | 40                                  | 17 | 41                  | 17 | 40                  | 16 | 41                    | 19 | 42                   | 20 | 40                   | 16 | 79                     | 100 |
| 3.00    | 44                                  | 26 | 44                  | 26 | 43                  | 26 | 45                    | 29 | 45                   | 30 | 43                   | 25 | 82                     | 100 |
| 3.25    | 47                                  | 37 | 47                  | 37 | 47                  | 37 | 48                    | 41 | 48                   | 42 | 47                   | 37 | 85                     | 100 |
| 3.50    | 50                                  | 50 | 50                  | 50 | 50                  | 50 | 51                    | 53 | 51                   | 54 | 50                   | 49 | 89                     | 100 |
| 3.75    | 53                                  | 63 | 53                  | 62 | 53                  | 63 | 54                    | 65 | 54                   | 66 | 53                   | 62 | 92                     | 100 |
| 4.00    | 56                                  | 74 | 56                  | 73 | 57                  | 74 | 57                    | 76 | 57                   | 76 | 56                   | 74 | 95                     | 100 |
| 4.25    | 60                                  | 83 | 59                  | 82 | 60                  | 84 | 60                    | 84 | 60                   | 85 | 60                   | 83 | 99                     | 100 |
| 4.50    | 63                                  | 90 | 62                  | 89 | 63                  | 91 | 63                    | 91 | 63                   | 91 | 63                   | 90 | 102                    | 100 |
| 4.75    | 66                                  | 95 | 66                  | 94 | 66                  | 95 | 66                    | 95 | 66                   | 95 | 66                   | 95 | 105                    | 100 |
| 5.00    | 69                                  | 97 | 69                  | 97 | 70                  | 98 | 70                    | 97 | 70                   | 97 | 69                   | 97 | 109                    | 100 |
