# Supplementary material for: Das Big Five Inventar 2
Source: Atypon-hosted journal article supplement (doi:10.1026/0012-1924/a000218), 2019-02-01
Supplement: 0012-1924_a000218_esm3.pdf [file 0012-1924_a000218_esm3.pdf]

## Big Five Inventar 2 (BFI-2)

Nachstehend finden Sie eine Reihe von Eigenschaften, die auf Sie zutreffen könnten. Würden Sie über sich z. B. sagen, dass Sie gerne Zeit mit anderen Menschen verbringen? Bitte geben Sie für jede der folgenden Aussagen an, inwieweit Sie zustimmen.

|                                                                | Stimme<br>überhaupt<br>nicht zu | Stimme<br>eher nicht<br>zu | Teils, teil              | Stimme<br>eher zu        | Stimme<br>voll und<br>ganz zu |
|----------------------------------------------------------------|---------------------------------|----------------------------|--------------------------|--------------------------|-------------------------------|
| 1. Ich gehe aus mir heraus, bin gesellig.                      | <input type="checkbox"/>        | <input type="checkbox"/>   | <input type="checkbox"/> | <input type="checkbox"/> | <input type="checkbox"/>      |
| 2. Ich bin einfühlsam, warmherzig.                             | <input type="checkbox"/>        | <input type="checkbox"/>   | <input type="checkbox"/> | <input type="checkbox"/> | <input type="checkbox"/>      |
| 3. Ich bin eher unordentlich.                                  | <input type="checkbox"/>        | <input type="checkbox"/>   | <input type="checkbox"/> | <input type="checkbox"/> | <input type="checkbox"/>      |
| 4. Ich bleibe auch in stressigen Situationen gelassen.         | <input type="checkbox"/>        | <input type="checkbox"/>   | <input type="checkbox"/> | <input type="checkbox"/> | <input type="checkbox"/>      |
| 5. Ich bin nicht sonderlich kunstinteressiert.                 | <input type="checkbox"/>        | <input type="checkbox"/>   | <input type="checkbox"/> | <input type="checkbox"/> | <input type="checkbox"/>      |
| 6. Ich bin durchsetzungsfähig, energisch.                      | <input type="checkbox"/>        | <input type="checkbox"/>   | <input type="checkbox"/> | <input type="checkbox"/> | <input type="checkbox"/>      |
| 7. Ich begegne anderen mit Respekt.                            | <input type="checkbox"/>        | <input type="checkbox"/>   | <input type="checkbox"/> | <input type="checkbox"/> | <input type="checkbox"/>      |
| 8. Ich bin bequem, neige zu Faulheit.                          | <input type="checkbox"/>        | <input type="checkbox"/>   | <input type="checkbox"/> | <input type="checkbox"/> | <input type="checkbox"/>      |
| 9. Ich bleibe auch bei Rückschlägen zuversichtlich.            | <input type="checkbox"/>        | <input type="checkbox"/>   | <input type="checkbox"/> | <input type="checkbox"/> | <input type="checkbox"/>      |
| 10. Ich bin vielseitig interessiert.                           | <input type="checkbox"/>        | <input type="checkbox"/>   | <input type="checkbox"/> | <input type="checkbox"/> | <input type="checkbox"/>      |
| 11. Ich schäume selten vor Begeisterung über.                  | <input type="checkbox"/>        | <input type="checkbox"/>   | <input type="checkbox"/> | <input type="checkbox"/> | <input type="checkbox"/>      |
| 12. Ich neige dazu, andere zu kritisieren.                     | <input type="checkbox"/>        | <input type="checkbox"/>   | <input type="checkbox"/> | <input type="checkbox"/> | <input type="checkbox"/>      |
| 13. Ich bin stetig, beständig.                                 | <input type="checkbox"/>        | <input type="checkbox"/>   | <input type="checkbox"/> | <input type="checkbox"/> | <input type="checkbox"/>      |
| 14. Ich kann launisch sein, habe schwankende Stimmungen.       | <input type="checkbox"/>        | <input type="checkbox"/>   | <input type="checkbox"/> | <input type="checkbox"/> | <input type="checkbox"/>      |
| 15. Ich bin erfinderisch, mir fallen raffinierte Lösungen ein. | <input type="checkbox"/>        | <input type="checkbox"/>   | <input type="checkbox"/> | <input type="checkbox"/> | <input type="checkbox"/>      |
| 16. Ich bin eher ruhig.                                        | <input type="checkbox"/>        | <input type="checkbox"/>   | <input type="checkbox"/> | <input type="checkbox"/> | <input type="checkbox"/>      |
| 17. Ich habe mit anderen wenig Mitgefühl.                      | <input type="checkbox"/>        | <input type="checkbox"/>   | <input type="checkbox"/> | <input type="checkbox"/> | <input type="checkbox"/>      |
| 18. Ich bin systematisch, halte meine Sachen in Ordnung.       | <input type="checkbox"/>        | <input type="checkbox"/>   | <input type="checkbox"/> | <input type="checkbox"/> | <input type="checkbox"/>      |
| 19. Ich reagiere leicht angespannt.                            | <input type="checkbox"/>        | <input type="checkbox"/>   | <input type="checkbox"/> | <input type="checkbox"/> | <input type="checkbox"/>      |
| 20. Ich kann mich für Kunst, Musik und Literatur begeistern.   | <input type="checkbox"/>        | <input type="checkbox"/>   | <input type="checkbox"/> | <input type="checkbox"/> | <input type="checkbox"/>      |
| 21. Ich neige dazu, die Führung zu übernehmen.                 | <input type="checkbox"/>        | <input type="checkbox"/>   | <input type="checkbox"/> | <input type="checkbox"/> | <input type="checkbox"/>      |
| 22. Ich habe oft Streit mit anderen.                           | <input type="checkbox"/>        | <input type="checkbox"/>   | <input type="checkbox"/> | <input type="checkbox"/> | <input type="checkbox"/>      |

|                                                                                         | Stimme<br>überhaupt<br>nicht zu | Stimme<br>eher nicht<br>zu | Teils, teil              | Stimme<br>eher zu        | Stimme<br>voll und<br>ganz zu |
|-----------------------------------------------------------------------------------------|---------------------------------|----------------------------|--------------------------|--------------------------|-------------------------------|
| 23. Ich neige dazu, Aufgaben vor mir herzuschieben.                                     | <input type="checkbox"/>        | <input type="checkbox"/>   | <input type="checkbox"/> | <input type="checkbox"/> | <input type="checkbox"/>      |
| 24. Ich bin selbstsicher, mit mir zufrieden.                                            | <input type="checkbox"/>        | <input type="checkbox"/>   | <input type="checkbox"/> | <input type="checkbox"/> | <input type="checkbox"/>      |
| 25. Ich meide philosophische Diskussionen.                                              | <input type="checkbox"/>        | <input type="checkbox"/>   | <input type="checkbox"/> | <input type="checkbox"/> | <input type="checkbox"/>      |
| 26. Ich bin weniger aktiv und unternehmungslustig als andere.                           | <input type="checkbox"/>        | <input type="checkbox"/>   | <input type="checkbox"/> | <input type="checkbox"/> | <input type="checkbox"/>      |
| 27. Ich bin nachsichtig, vergebe anderen leicht.                                        | <input type="checkbox"/>        | <input type="checkbox"/>   | <input type="checkbox"/> | <input type="checkbox"/> | <input type="checkbox"/>      |
| 28. Ich bin manchmal ziemlich nachlässig.                                               | <input type="checkbox"/>        | <input type="checkbox"/>   | <input type="checkbox"/> | <input type="checkbox"/> | <input type="checkbox"/>      |
| 29. Ich bin ausgeglichen, nicht leicht aus der Ruhe zu bringen.                         | <input type="checkbox"/>        | <input type="checkbox"/>   | <input type="checkbox"/> | <input type="checkbox"/> | <input type="checkbox"/>      |
| 30. Ich bin nicht besonders einfallsreich.                                              | <input type="checkbox"/>        | <input type="checkbox"/>   | <input type="checkbox"/> | <input type="checkbox"/> | <input type="checkbox"/>      |
| 31. Ich bin eher schüchtern.                                                            | <input type="checkbox"/>        | <input type="checkbox"/>   | <input type="checkbox"/> | <input type="checkbox"/> | <input type="checkbox"/>      |
| 32. Ich bin hilfsbereit und selbstlos.                                                  | <input type="checkbox"/>        | <input type="checkbox"/>   | <input type="checkbox"/> | <input type="checkbox"/> | <input type="checkbox"/>      |
| 33. Ich mag es sauber und aufgeräumt.                                                   | <input type="checkbox"/>        | <input type="checkbox"/>   | <input type="checkbox"/> | <input type="checkbox"/> | <input type="checkbox"/>      |
| 34. Ich mache mir oft Sorgen.                                                           | <input type="checkbox"/>        | <input type="checkbox"/>   | <input type="checkbox"/> | <input type="checkbox"/> | <input type="checkbox"/>      |
| 35. Ich weiß Kunst und Schönheit zu schätzen.                                           | <input type="checkbox"/>        | <input type="checkbox"/>   | <input type="checkbox"/> | <input type="checkbox"/> | <input type="checkbox"/>      |
| 36. Mir fällt es schwer, andere zu beeinflussen.                                        | <input type="checkbox"/>        | <input type="checkbox"/>   | <input type="checkbox"/> | <input type="checkbox"/> | <input type="checkbox"/>      |
| 37. Ich bin manchmal unhöflich und schroff.                                             | <input type="checkbox"/>        | <input type="checkbox"/>   | <input type="checkbox"/> | <input type="checkbox"/> | <input type="checkbox"/>      |
| 38. Ich bin effizient, erledige Dinge schnell.                                          | <input type="checkbox"/>        | <input type="checkbox"/>   | <input type="checkbox"/> | <input type="checkbox"/> | <input type="checkbox"/>      |
| 39. Ich fühle mich oft bedrückt, freudlos.                                              | <input type="checkbox"/>        | <input type="checkbox"/>   | <input type="checkbox"/> | <input type="checkbox"/> | <input type="checkbox"/>      |
| 40. Es macht mir Spaß, gründlich über komplexe Dinge nachzudenken und sie zu verstehen. | <input type="checkbox"/>        | <input type="checkbox"/>   | <input type="checkbox"/> | <input type="checkbox"/> | <input type="checkbox"/>      |
| 41. Ich bin voller Energie und Tatendrang.                                              | <input type="checkbox"/>        | <input type="checkbox"/>   | <input type="checkbox"/> | <input type="checkbox"/> | <input type="checkbox"/>      |
| 42. Ich bin anderen gegenüber misstrauisch.                                             | <input type="checkbox"/>        | <input type="checkbox"/>   | <input type="checkbox"/> | <input type="checkbox"/> | <input type="checkbox"/>      |
| 43. Ich bin verlässlich, auf mich kann man zählen.                                      | <input type="checkbox"/>        | <input type="checkbox"/>   | <input type="checkbox"/> | <input type="checkbox"/> | <input type="checkbox"/>      |
| 44. Ich habe meine Gefühle unter Kontrolle, werde selten wütend.                        | <input type="checkbox"/>        | <input type="checkbox"/>   | <input type="checkbox"/> | <input type="checkbox"/> | <input type="checkbox"/>      |
| 45. Ich bin nicht sonderlich fantasievoll.                                              | <input type="checkbox"/>        | <input type="checkbox"/>   | <input type="checkbox"/> | <input type="checkbox"/> | <input type="checkbox"/>      |
| 46. Ich bin gesprächig.                                                                 | <input type="checkbox"/>        | <input type="checkbox"/>   | <input type="checkbox"/> | <input type="checkbox"/> | <input type="checkbox"/>      |
| 47. Andere sind mir eher gleichgültig, egal.                                            | <input type="checkbox"/>        | <input type="checkbox"/>   | <input type="checkbox"/> | <input type="checkbox"/> | <input type="checkbox"/>      |
| 48. Ich bin eher der chaotische Typ, mache selten sauber.                               | <input type="checkbox"/>        | <input type="checkbox"/>   | <input type="checkbox"/> | <input type="checkbox"/> | <input type="checkbox"/>      |

|                                                                           | Stimme<br>überhaupt<br>nicht zu | Stimme<br>eher nicht<br>zu | Teils, teil              | Stimme<br>eher zu        | Stimme<br>voll und<br>ganz zu |
|---------------------------------------------------------------------------|---------------------------------|----------------------------|--------------------------|--------------------------|-------------------------------|
| 49. Ich werde selten nervös und unsicher.                                 | <input type="checkbox"/>        | <input type="checkbox"/>   | <input type="checkbox"/> | <input type="checkbox"/> | <input type="checkbox"/>      |
| 50. Ich finde Gedichte und Theaterstücke langweilig.                      | <input type="checkbox"/>        | <input type="checkbox"/>   | <input type="checkbox"/> | <input type="checkbox"/> | <input type="checkbox"/>      |
| 51. In einer Gruppe überlasse ich lieber anderen die Entscheidung.        | <input type="checkbox"/>        | <input type="checkbox"/>   | <input type="checkbox"/> | <input type="checkbox"/> | <input type="checkbox"/>      |
| 52. Ich bin höflich und zuvorkommend.                                     | <input type="checkbox"/>        | <input type="checkbox"/>   | <input type="checkbox"/> | <input type="checkbox"/> | <input type="checkbox"/>      |
| 53. Ich bleibe an einer Aufgabe dran, bis sie erledigt ist.               | <input type="checkbox"/>        | <input type="checkbox"/>   | <input type="checkbox"/> | <input type="checkbox"/> | <input type="checkbox"/>      |
| 54. Ich bin oft deprimiert, niedergeschlagen.                             | <input type="checkbox"/>        | <input type="checkbox"/>   | <input type="checkbox"/> | <input type="checkbox"/> | <input type="checkbox"/>      |
| 55. Mich interessieren abstrakte Überlegungen wenig.                      | <input type="checkbox"/>        | <input type="checkbox"/>   | <input type="checkbox"/> | <input type="checkbox"/> | <input type="checkbox"/>      |
| 56. Ich bin begeisterungsfähig und kann andere leicht mitreißen.          | <input type="checkbox"/>        | <input type="checkbox"/>   | <input type="checkbox"/> | <input type="checkbox"/> | <input type="checkbox"/>      |
| 57. Ich schenke anderen leicht Vertrauen, glaube an das Gute im Menschen. | <input type="checkbox"/>        | <input type="checkbox"/>   | <input type="checkbox"/> | <input type="checkbox"/> | <input type="checkbox"/>      |
| 58. Manchmal verhalte ich mich verantwortungslos, leichtsinnig.           | <input type="checkbox"/>        | <input type="checkbox"/>   | <input type="checkbox"/> | <input type="checkbox"/> | <input type="checkbox"/>      |
| 59. Ich reagiere schnell gereizt oder genervt.                            | <input type="checkbox"/>        | <input type="checkbox"/>   | <input type="checkbox"/> | <input type="checkbox"/> | <input type="checkbox"/>      |
| 60. Ich bin originell, entwickle neue Ideen.                              | <input type="checkbox"/>        | <input type="checkbox"/>   | <input type="checkbox"/> | <input type="checkbox"/> | <input type="checkbox"/>      |

**Bitte überprüfen Sie es sorgfältig: Haben Sie jede Aussage beantwortet?**

## Auswertung

Diese Seite zeigt die Zuordnung der Items zu den BFI-2-Dimensionen und -Facetten. Umzupolende Items sind mit einem "R" gekennzeichnet.

### Dimensionen

Extraversion: 1, 6, 11R, 16R, 21, 26R, 31R, 36R, 41, 46, 51R, 56

Verträglichkeit: 2, 7, 12R, 17R, 22R, 27, 32, 37R, 42R, 47R, 52, 57

Gewissenhaftigkeit: 3R, 8R, 13, 18, 23R, 28R, 33, 38, 43, 48R, 53, 58R

Negative Emotionalität: 4R, 9R, 14, 19, 24R, 29R, 34, 39, 44R, 49R, 54, 59

Offenheit: 5R, 10, 15, 20, 25R, 30R, 35, 40, 45R, 50R, 55R, 60

### Facetten

Geselligkeit: 1, 16R, 31R, 46

Durchsetzungsfähigkeit: 6, 21, 36R, 51R

Aktivität: 11R, 26R, 41, 56

Mitgefühl: 2, 17R, 32, 47R

Höflichkeit: 7, 22R, 37R, 52

Zwischenmenschliches Vertrauen: 12R, 27, 42R, 57

Ordnungsliebe: 3R, 18, 33, 48R

Fleiß: 8R, 23R, 38, 53

Verlässlichkeit: 13, 28R, 43, 58R

Ängstlichkeit: 4R, 19, 34, 49R

Niedergeschlagenheit: 9R, 24R, 39, 54

Unbeständigkeit der Gefühle: 14, 29R, 44R, 59

Ästhetisches Empfinden: 5R, 20, 35, 50R

Intellektuelle Neugierde: 10, 25R, 40, 55R

Kreativer Einfallsreichtum: 15, 30R, 45R, 60
